# Supplementary material for: Ruthenium(ii)-catalysed direct synthesis of mono-allylation products of 1,3-diketones from cinnamyl alcohols
Source: Royal Society of Chemistry journal article supplement (doi:10.1039/d2nj01650h), 2022-01-01
Supplement: d2nj01650h1.pdf [file d2nj01650h1.pdf]

Electronic Supplementary Information

**Ruthenium(II) Catalysed Direct Synthesis of Mono-allylation Products of 1,3-diketones by Cinnamyl Alcohols**

Rajesh K. Jena, <sup>\*a,c</sup> Mahesh Samanta, <sup>b</sup> Mohan Chandra Sau, <sup>b</sup> Braja N. Patra <sup>a,c</sup> and Manish Bhattacharjee <sup>b</sup>

<sup>a</sup>Centre of Excellence in Advanced Materials and Applications, Utkal University, Vani Vihar, BBSR 751 004, India

<sup>b</sup>Department of Chemistry, Indian Institute of Technology, Kharagpur 721 302, India

<sup>c</sup>Department of Chemistry, Utkal University, Vani Vihar, Bhubaneswar 751 004, India

Email- [rajeshjena@utkaluniversity.ac.in](mailto:rajeshjena@utkaluniversity.ac.in)

**Table of Contents**

| <b>Contents</b>                                                                                               | <b>Page number</b> |
|---------------------------------------------------------------------------------------------------------------|--------------------|
| Table S1 .....                                                                                                | 2                  |
| Table S2.....                                                                                                 | 3                  |
| <sup>1</sup> H, <sup>13</sup> C, NOESY, HSQC and <sup>31</sup> P, NMR spectra of 1 (Fig S1 to S5) .....       | 4-6                |
| IR, CV, UV-Vs, HRMS and CHN data of 1 (Fig S6 to S10) .....                                                   | 6-8                |
| <sup>1</sup> H and <sup>13</sup> C NMR spectra of the alkylation products <b>4a-4j</b> (Fig-S11 to S30) ..... | 9-18               |
| <i>In-situ</i> <sup>1</sup> H and <sup>31</sup> P NMR spectra of the reaction mixture (Fig-S31 to S34) .....  | 19-20              |
| Chiral HPLC of some chiral alkylated products (Fig-S35 to S41) .....                                          | 20-27              |

**Table S1 Crystal data and structure refinement for 1**

| Complex                                              | <b>1</b>                                                           |
|------------------------------------------------------|--------------------------------------------------------------------|
| Empirical formula                                    | C <sub>43</sub> H <sub>46</sub> ClF <sub>6</sub> P <sub>3</sub> Ru |
| Formula weight                                       | 906.23                                                             |
| Temperature, K                                       | 100(3)                                                             |
| Wavelength (Å)                                       | 0.71073                                                            |
| Crystal system                                       | Orthorhombic                                                       |
| Space group                                          | P2 <sub>1</sub> 2 <sub>1</sub> 2 <sub>1</sub>                      |
| <i>a</i> (Å)                                         | 10.4015(6)                                                         |
| <i>b</i> (Å)                                         | 12.1513(6)                                                         |
| <i>c</i> (Å)                                         | 31.7163(16)                                                        |
| $\alpha, \beta, \gamma$ (°)                          | 90, 90, 90                                                         |
| <i>V</i> (Å <sup>3</sup> )                           | 4008.7(4)                                                          |
| <i>Z</i>                                             | 4                                                                  |
| D <sub>calc.</sub> (Mg/m <sup>3</sup> )              | 1.480                                                              |
| $\mu$ (Mo-K $\alpha$ ) (mm <sup>-1</sup> )           | 0.637                                                              |
| F(000)                                               | 1856                                                               |
| $\theta$ Range (°)                                   | 1.795 to 24.994                                                    |
| Reflections collected                                | 46642                                                              |
| Unique reflections                                   | 7086                                                               |
| R(int)                                               | 0.0646                                                             |
| Restraints                                           | 0                                                                  |
| parameters                                           | 491                                                                |
| Goodness of fit (F <sup>2</sup> )                    | 1.024                                                              |
| Absolute structure (Flack) parameter                 | -0.02(2)                                                           |
| Final R indices [ <i>I</i> >2 $\sigma$ ( <i>I</i> )] | <i>RI</i> = 0.0313, <i>wRI</i> = 0.0677                            |
| <i>R</i> indices (all data)                          | <i>RI</i> = 0.0354, <i>wRI</i> = 0.0699                            |

**Table S2 Important bond distances (Å) and bond angles (°) for 1**

| Selected bond lengths (Å) |            | Selected angles (°) |          |
|---------------------------|------------|---------------------|----------|
| P(1)-Ru(1)                | 2.3091(13) | C(7)-C(2)-Ru(1)     | 70.7(5)  |
| P(2)-Ru(1)                | 2.3250(13) | C(3)-C(2)-Ru(1)     | 71.3(5)  |
| Cl(1)-Ru(1)               | 2.3938(11) | C(1)-C(2)-Ru(1)     | 133.5(6) |
| C(1)-Ru(1)                | 2.201(5)   | C(4)-C(3)-Ru(1)     | 72.8(5)  |
| C(2)-Ru(1)                | 2.245(8)   | C(2)-C(3)-Ru(1)     | 72.3(5)  |
| C(3)-Ru(1)                | 2.263(9)   | C(3)-C(4)-Ru(1)     | 71.4(5)  |
| C(4)-Ru(1)                | 2.341(8)   | C(5)-C(4)-Ru(1)     | 74.6(5)  |
| C(5)-Ru(1)                | 2.239(5)   | C(6)-C(5)-Ru(1)     | 70.7(4)  |
| C(6)-Ru(1)                | 2.222(8)   | C(4)-C(5)-Ru(1)     | 68.7(5)  |
| Centroid-Ru(1)            | 1.757      | C(8)-C(5)-Ru(1)     | 132.3(7) |
|                           |            | C(7)-C(6)-Ru(1)     | 68.7(4)  |
|                           |            | C(5)-C(6)-Ru(1)     | 73.7(4)  |
|                           |            | C(2)-C(7)-Ru(1)     | 73.6(5)  |
|                           |            | C(6)-C(7)-Ru(1)     | 74.8(5)  |
|                           |            | P(2)-Ru(1)-P(1)     | 83.80(8) |
|                           |            | P(2)-Ru(1)-Cl(1)    | 80.88(7) |
|                           |            | P(1)-Ru(1)-Cl(1)    | 85.63(8) |

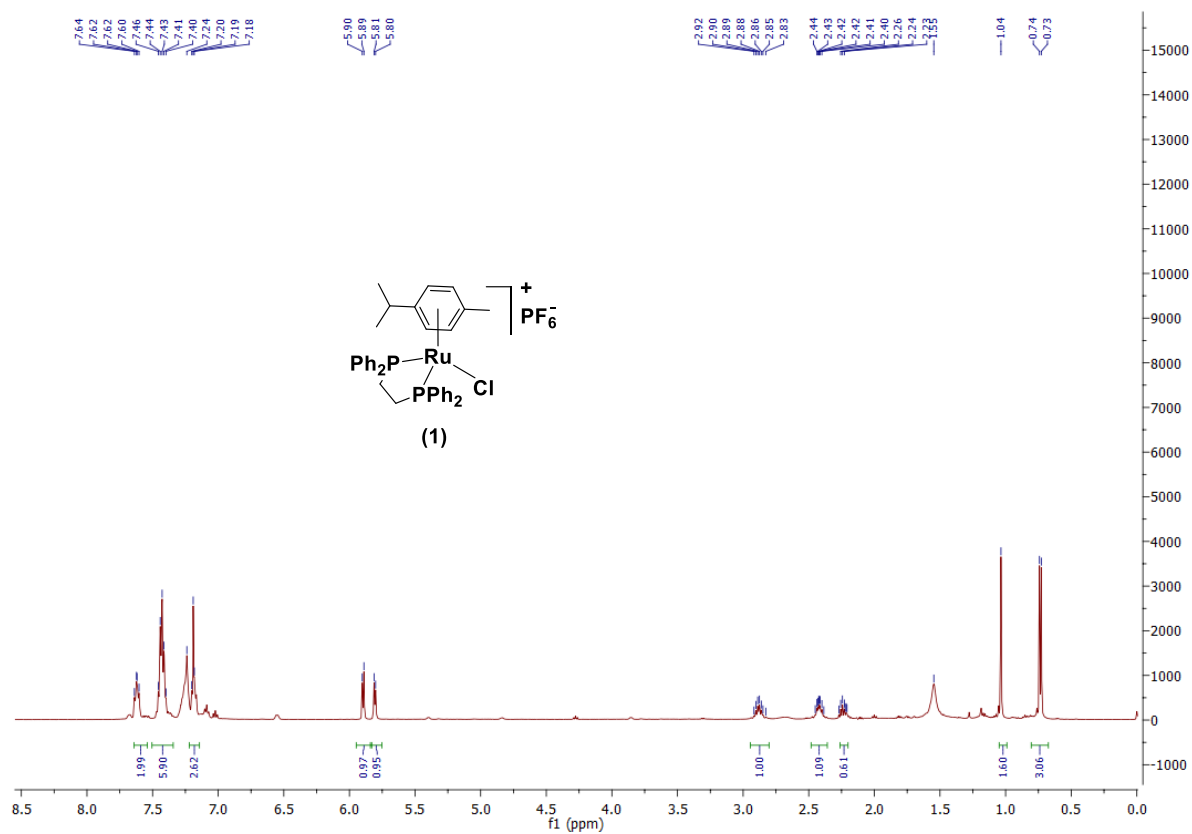

**Figure S1** <sup>1</sup>H NMR (500 MHz, CDCl<sub>3</sub>) spectrum of **1**

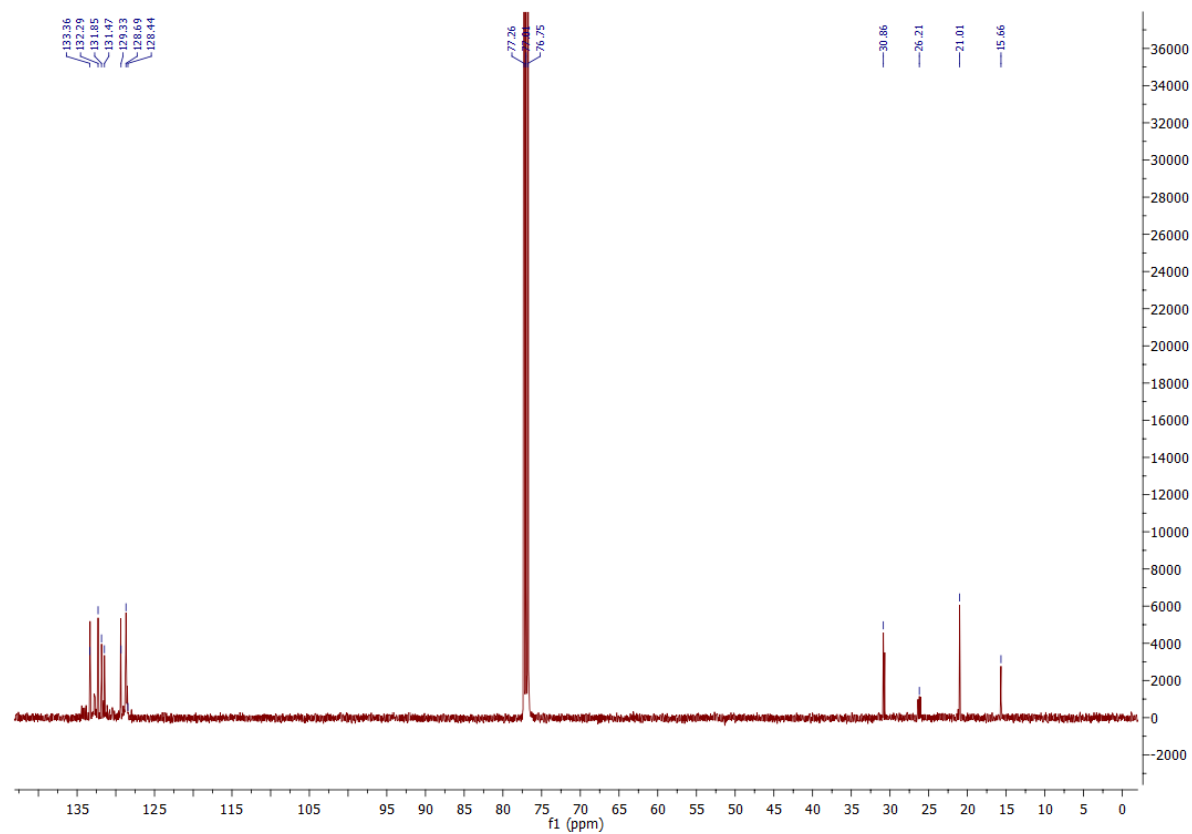

**Figure S2** <sup>13</sup>C NMR (125 MHz, CDCl<sub>3</sub>) spectrum of **1**



mb / ms / r 16 - 1h - 500mhz

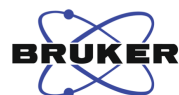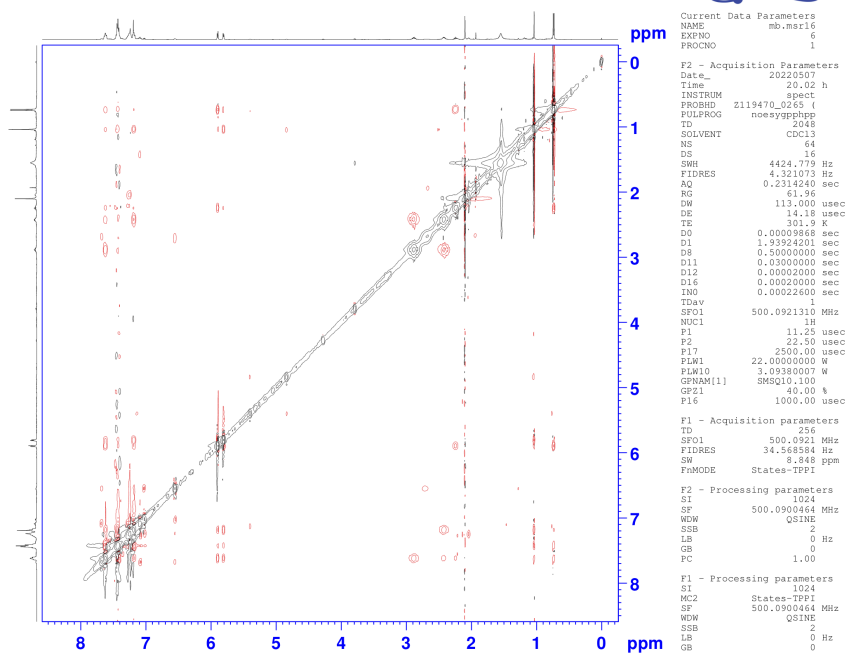

Figure S3 NOSEY spectrum of 1

mb / ms / r 16 - 1h - 500mhz

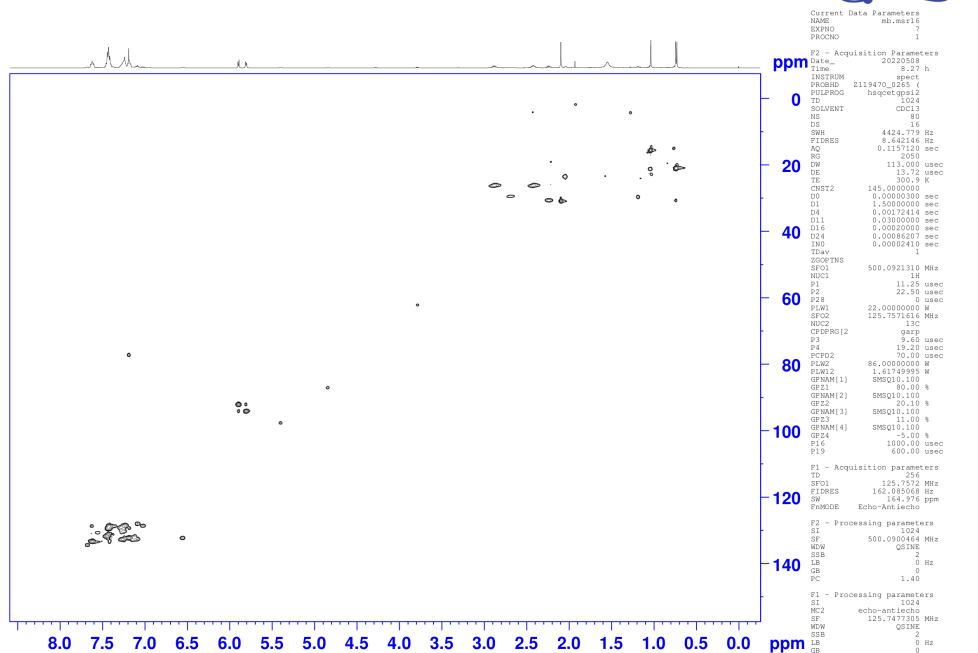

Figure S4 HSQC spectrum of 1

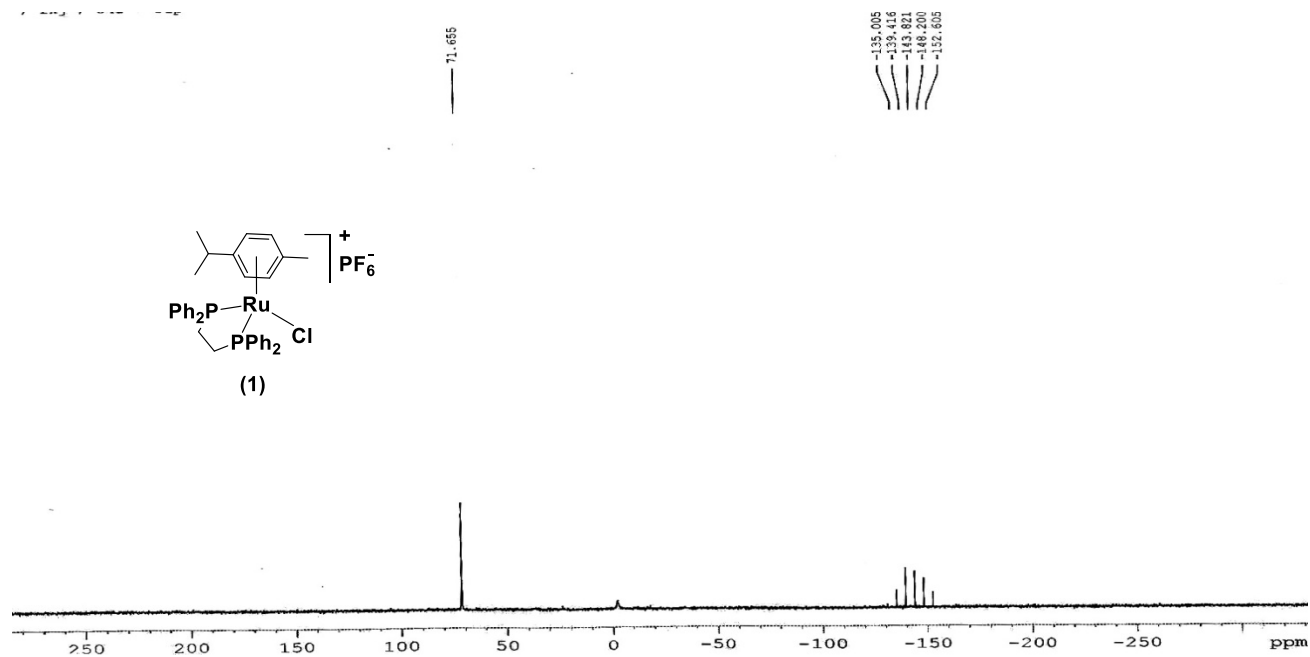

Figure S5  $^{31}P$  NMR (161.98 MHz,  $CDCl_3$ ) spectrum of **1**

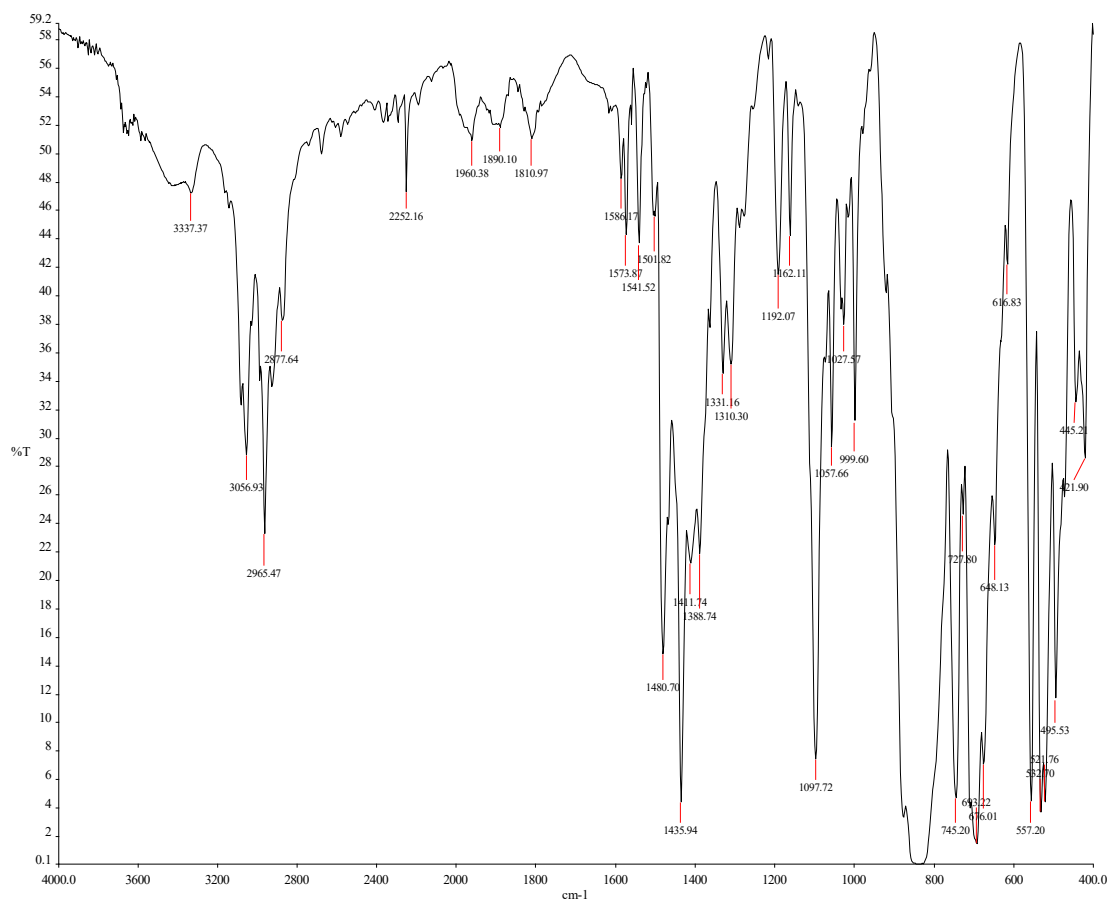

Figure S6 IR spectra of complex **1**

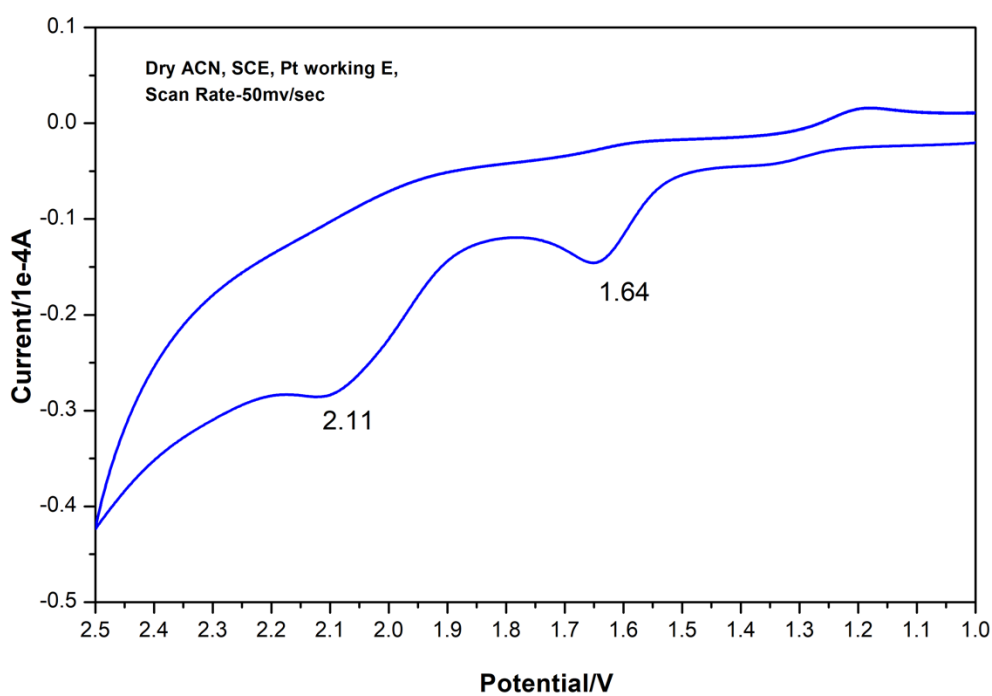

Figure S7 Cyclic voltammogram of complex 1

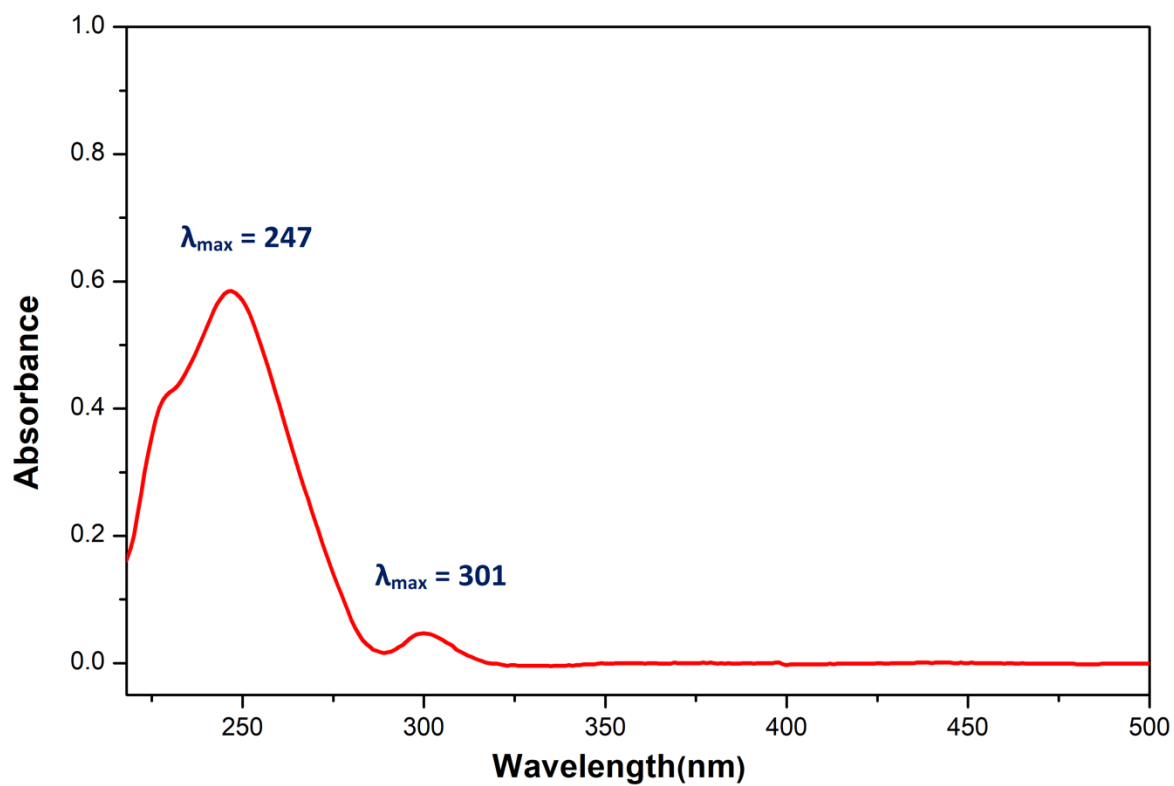

Figure S8 UV-vis spectrum of complex 1

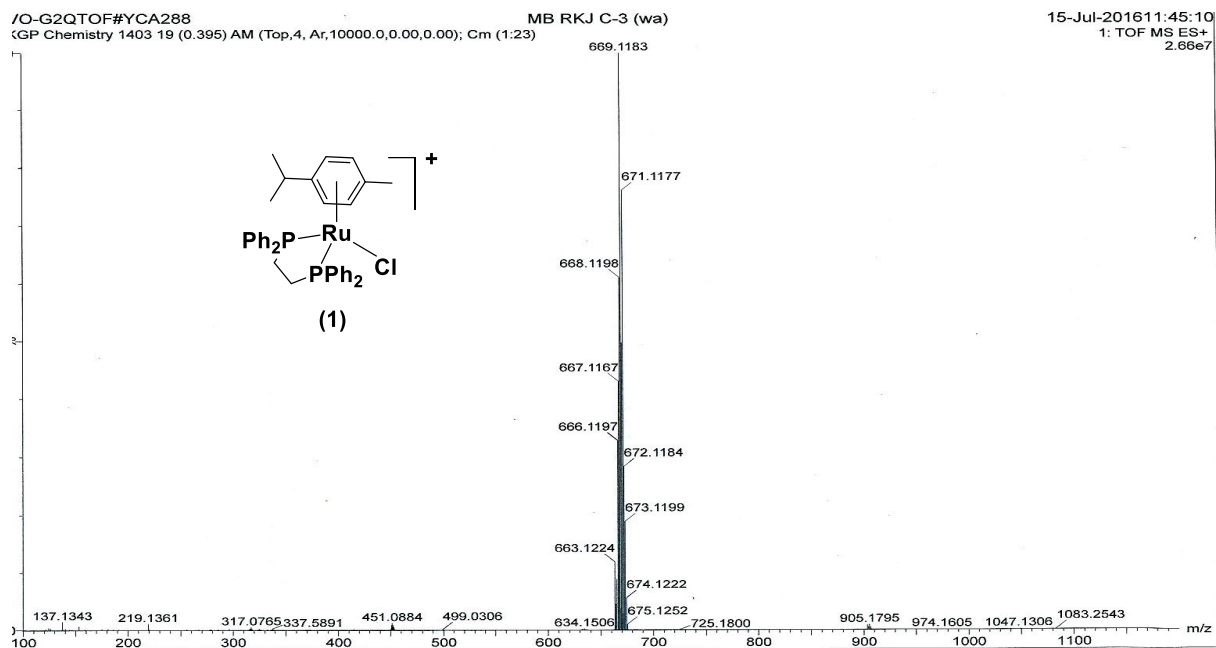

Figure S9 HRMS of complex 1

### EuroEA Elemental Analyser

AutoRun name : BBS NISER-20052022 (78)  
 Date of Analysis : 20 May 2022  
 Time of Analysis : 13:38:21  
 Analysed By : EVR  
 Signed By : EVR  
 Operator Group : GRP1  
 Configuration : CHNS

Sample name : RKSY-002-01  
 Sample position # : 9  
 Type : Smp  
 Sample weight : 1.371 (mg)  
 Calibration type : Linear

#### Instrument Parameters

| Carrier (kPa) | Purge (ml/min) | Oxygen (ml) | Delta P O2 (kPa) | Sampling Delay (s) | Run Time (s) | Front (°C) | Rear (°C) | Oven (°C) |
|---------------|----------------|-------------|------------------|--------------------|--------------|------------|-----------|-----------|
| 120           | 80             | 15          | 35               | 10                 | 360          | 980        | Off       | 100       |

#### Chromatogram

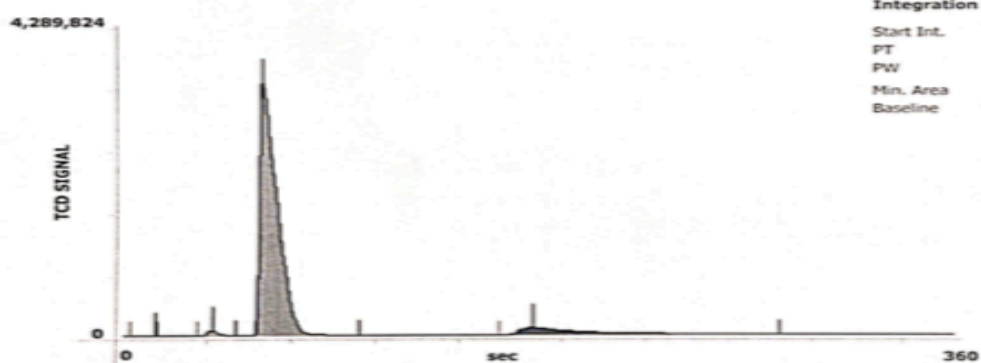

#### Integration Parameters

|            |               |
|------------|---------------|
| Start Int. | 1             |
| PT         | 1             |
| PW         | 1             |
| Min. Area  | 1000          |
| Baseline   | Valley-Valley |

#### Results

| Element  | RT (s) | Start (s) | End (s) | Area      | Area % | Element % |
|----------|--------|-----------|---------|-----------|--------|-----------|
| Nitrogen | 38     | 32        | 48      | 43,077    | 1.070  | 1.751     |
| Carbon   | 60     | 56        | 101     | 3,552,612 | 88.254 | 48.223    |
| Hydrogen | 176    | 162       | 283     | 429,773   | 10.676 | 3.141     |
| Sulphur  | -      | -         | -       | -         | -      | -         |
| Oxygen   | -      | -         | -       | -         | -      | -         |

Figure S10 Elemental analysis of complex 1

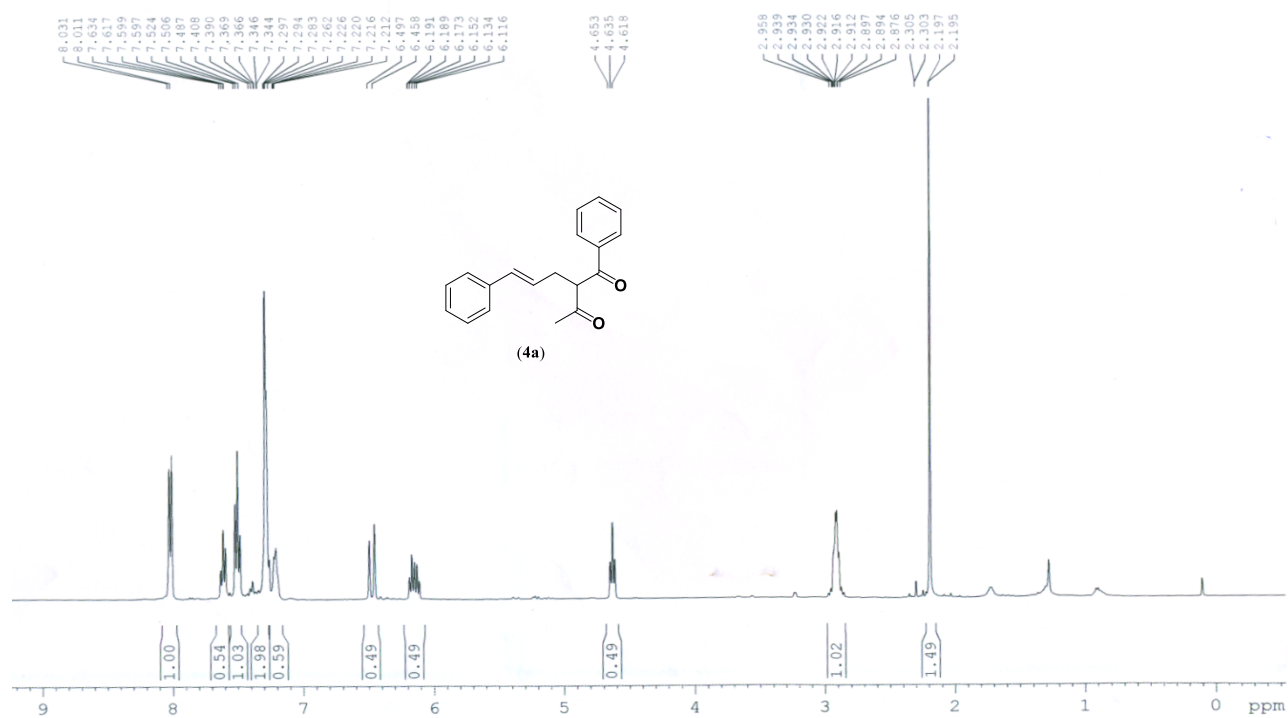

**Figure S11** <sup>1</sup>H NMR (400 MHz) spectrum of compound **4a** in CDCl<sub>3</sub>

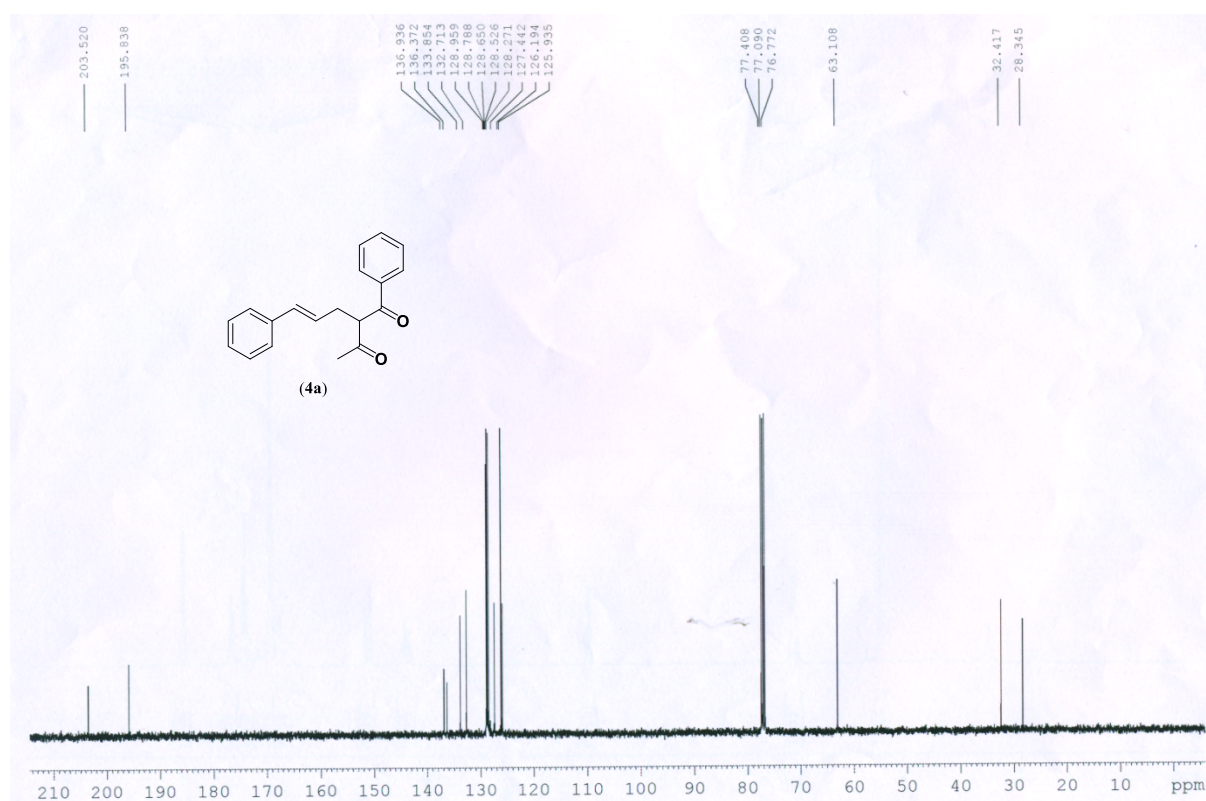

**Figure S12** <sup>13</sup>C NMR (100 MHz) spectrum of compound **4a** in CDCl<sub>3</sub>

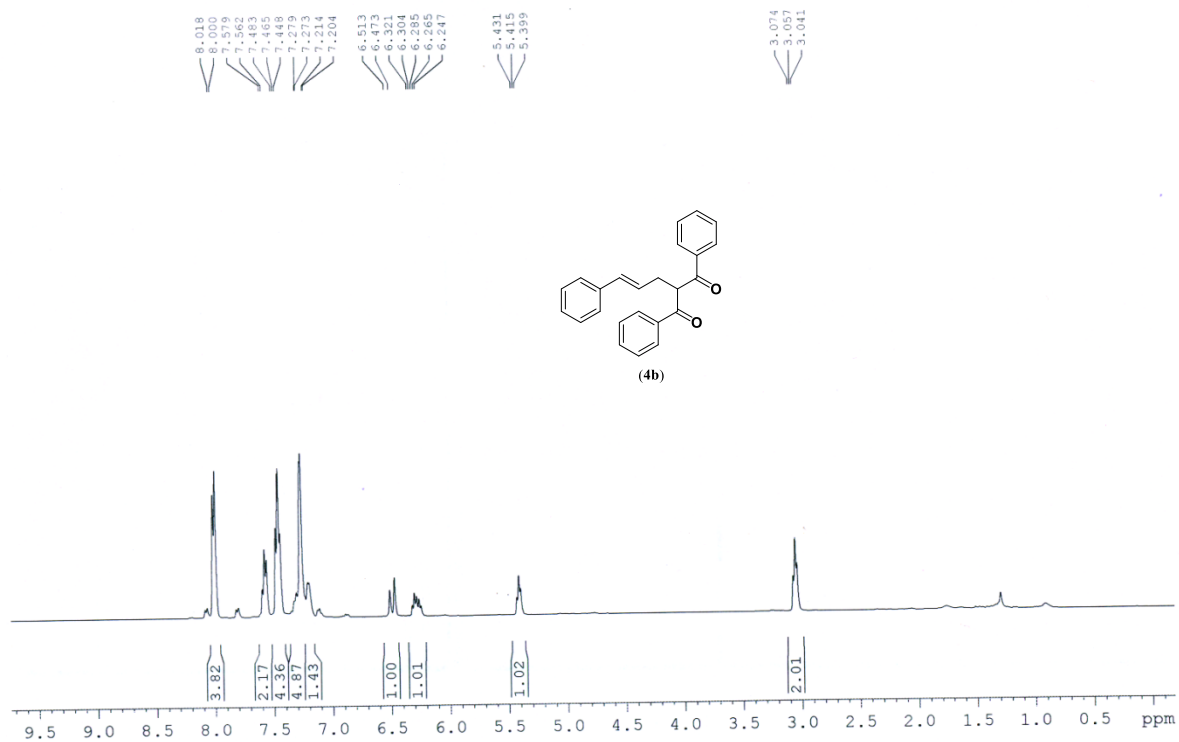

**Figure S13** <sup>1</sup>H NMR (400 MHz) spectrum of compound **4b** in CDCl<sub>3</sub>

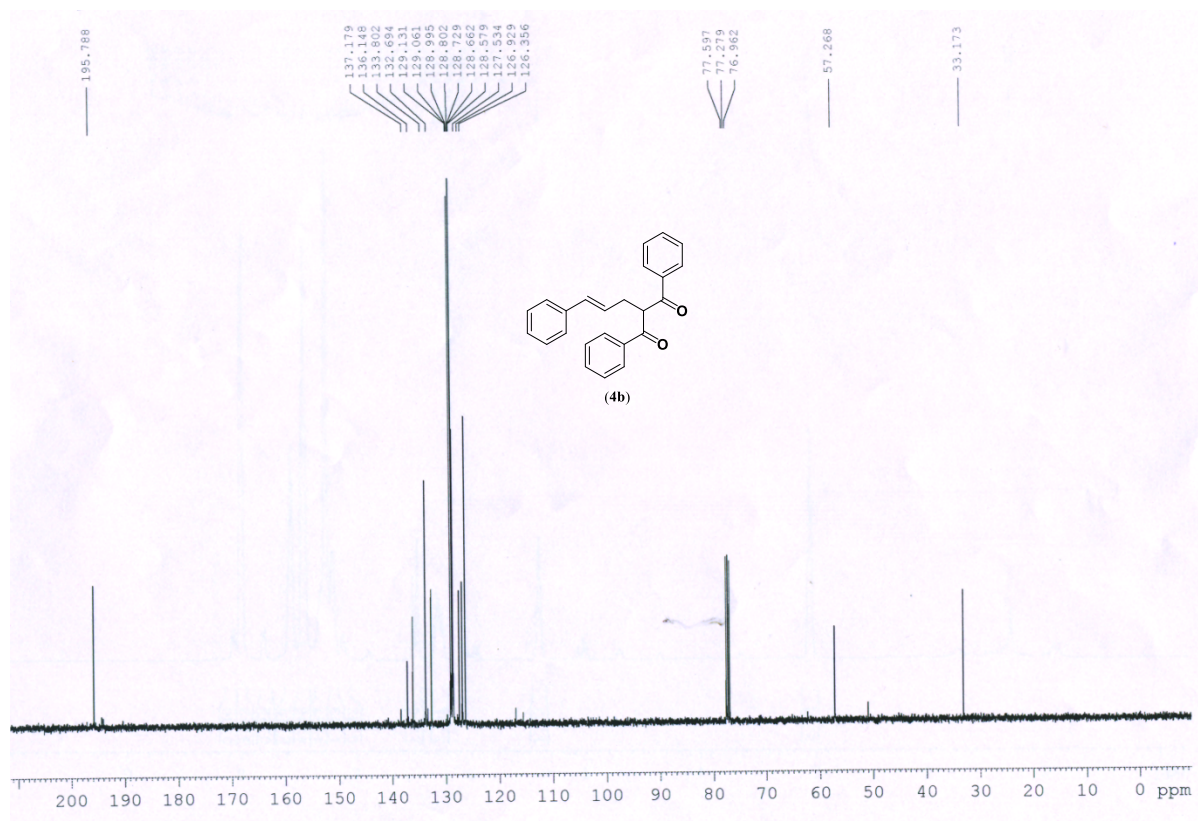

**Figure S14** <sup>13</sup>C NMR (100 MHz) spectrum of compound **4b** in CDCl<sub>3</sub>



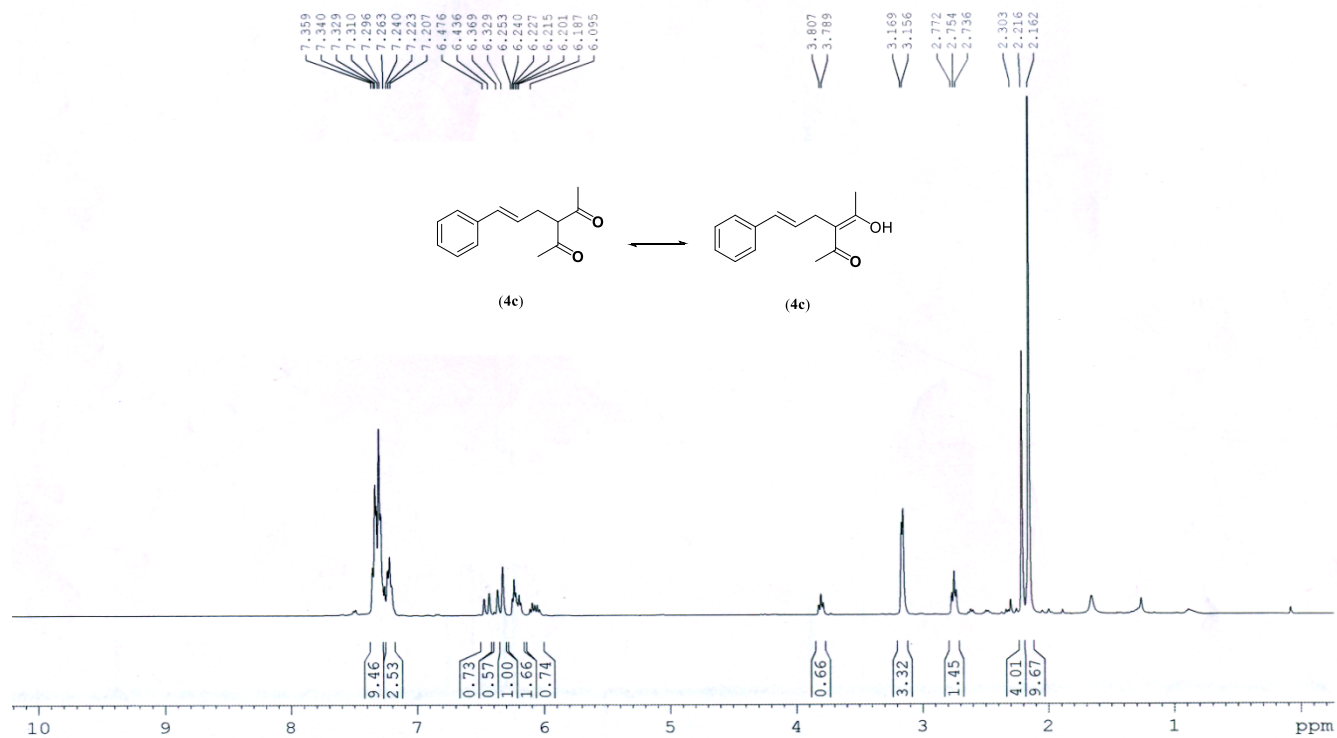

**Figure S15**  $^1\text{H}$  NMR (400 MHz) spectrum of compound **4c** in  $\text{CDCl}_3$

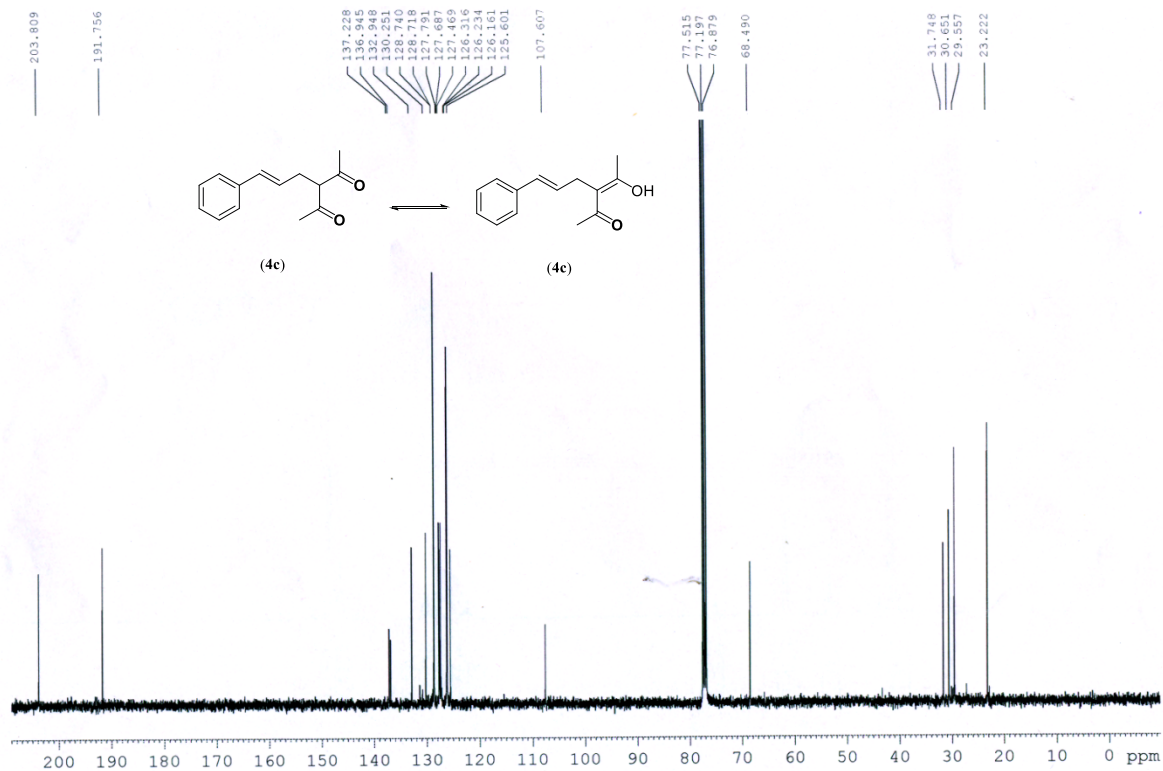

**Figure S16**  $^{13}\text{C}$  NMR (100 MHz) spectrum of compound **4c** in  $\text{CDCl}_3$

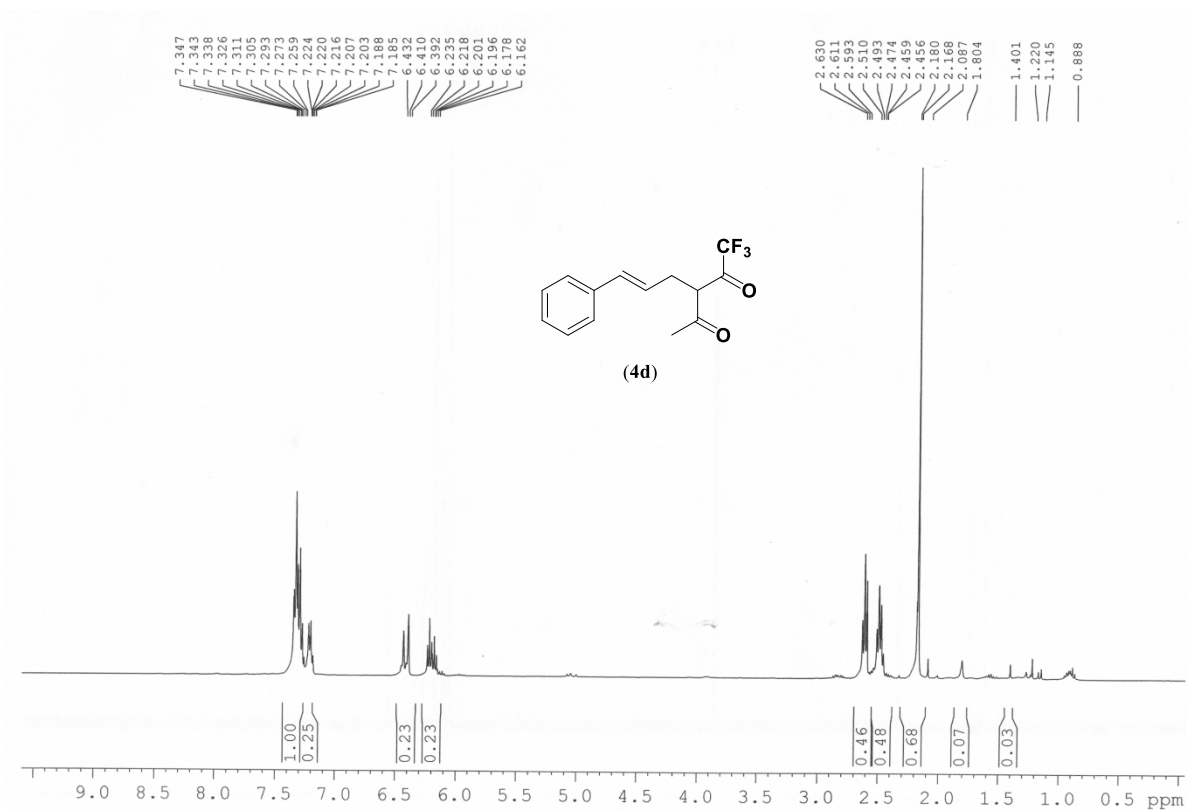

**Figure S17** <sup>1</sup>H NMR (400 MHz) spectrum of compound **4d** in CDCl<sub>3</sub>

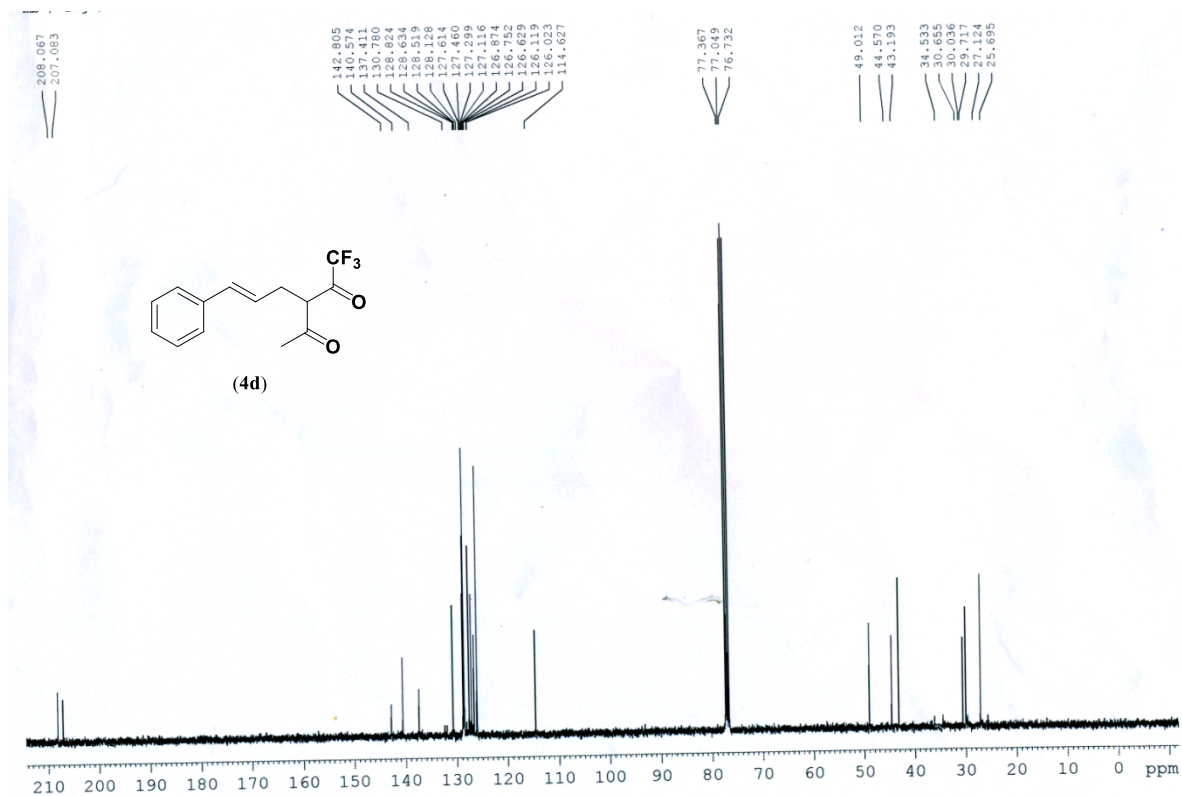

**Figure S18** <sup>13</sup>C NMR (100 MHz) spectrum of compound **4d** in CDCl<sub>3</sub>



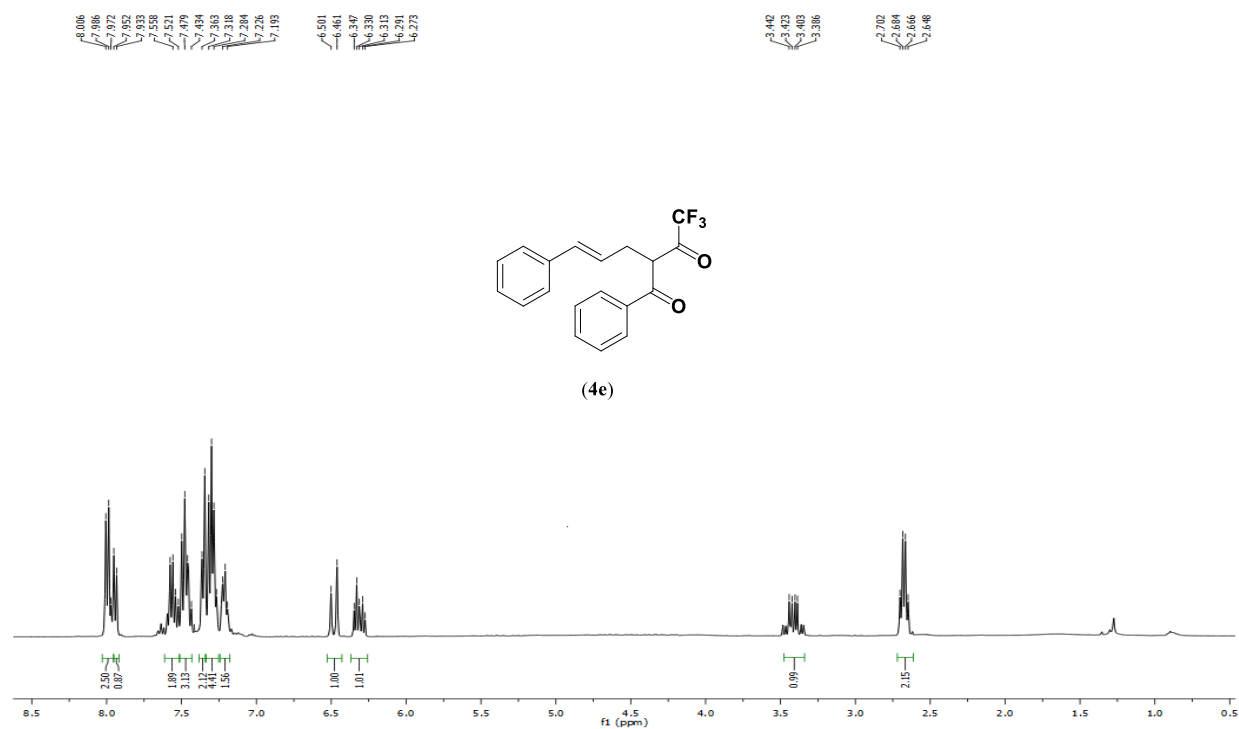

**Figure S19** <sup>1</sup>H NMR (400 MHz) spectrum of compound **4e** in CDCl<sub>3</sub>

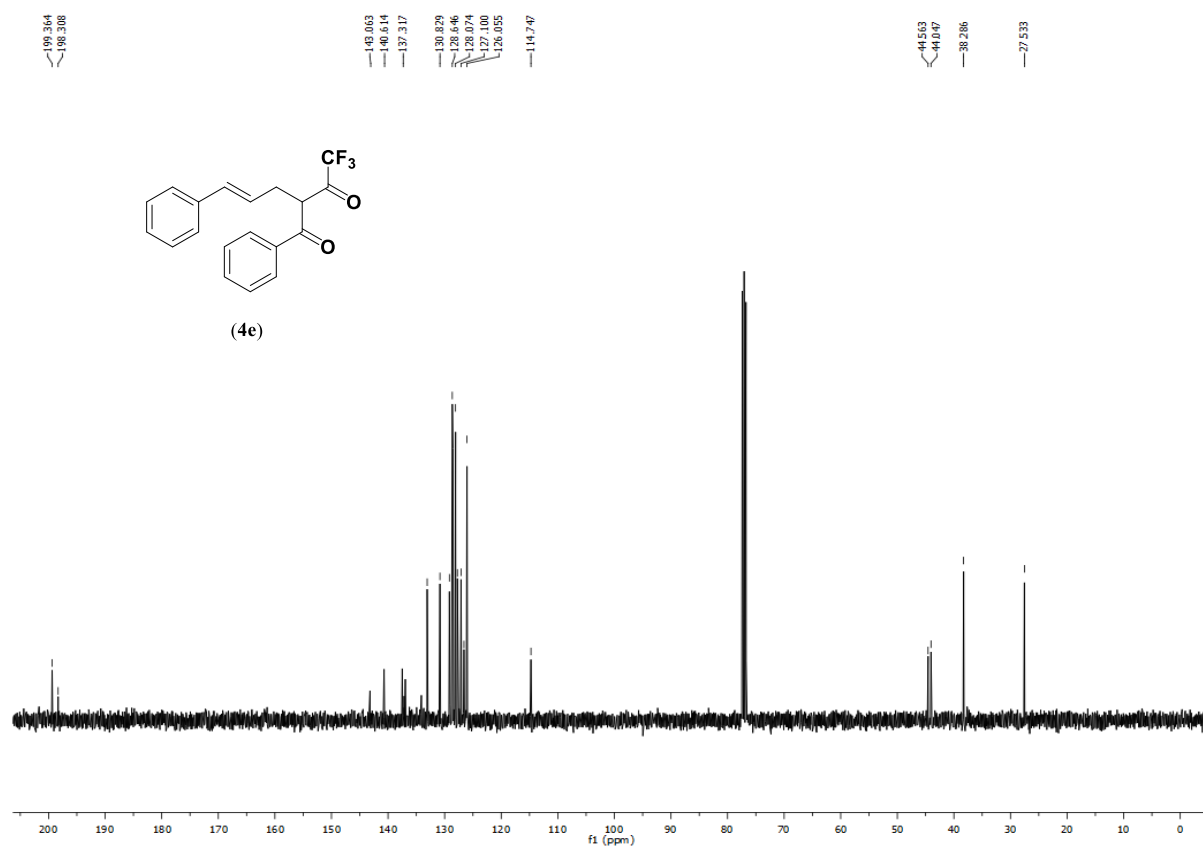

**Figure S20** <sup>13</sup>C NMR (100 MHz) spectrum of compound **4e** in CDCl<sub>3</sub>

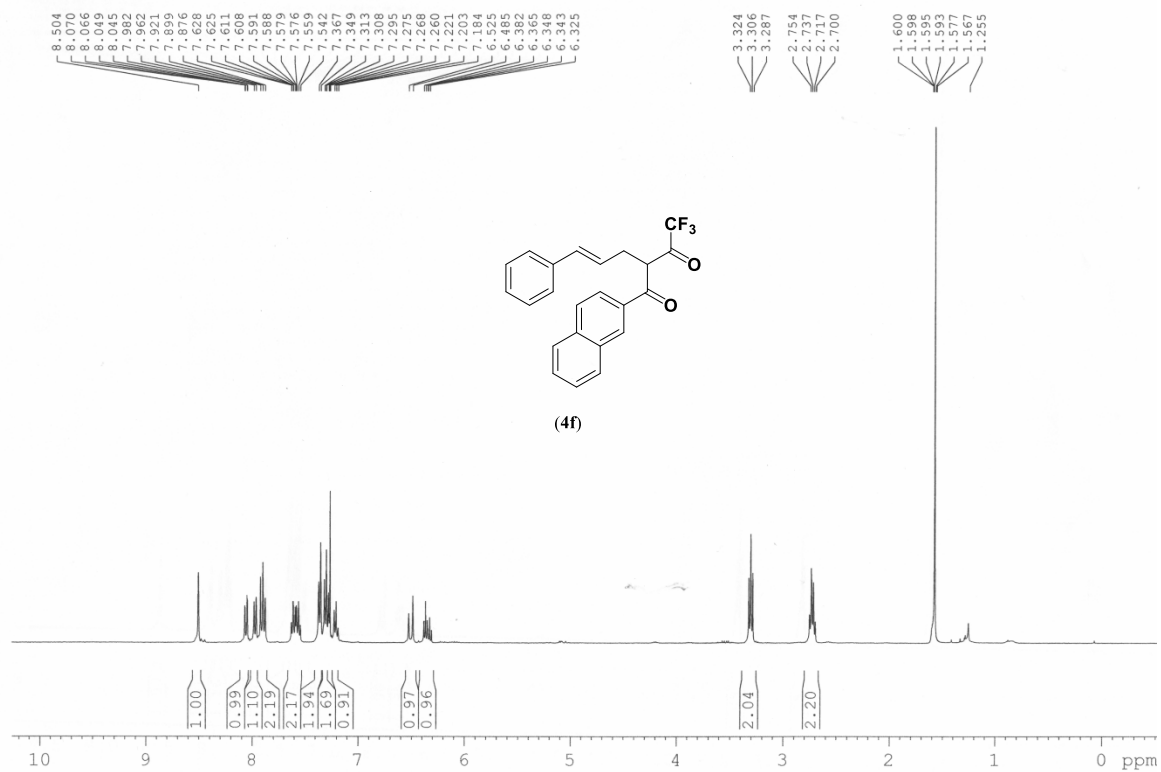

**Figure S21**  $^1\text{H}$  NMR (400 MHz) spectrum of compound **4f** in  $\text{CDCl}_3$

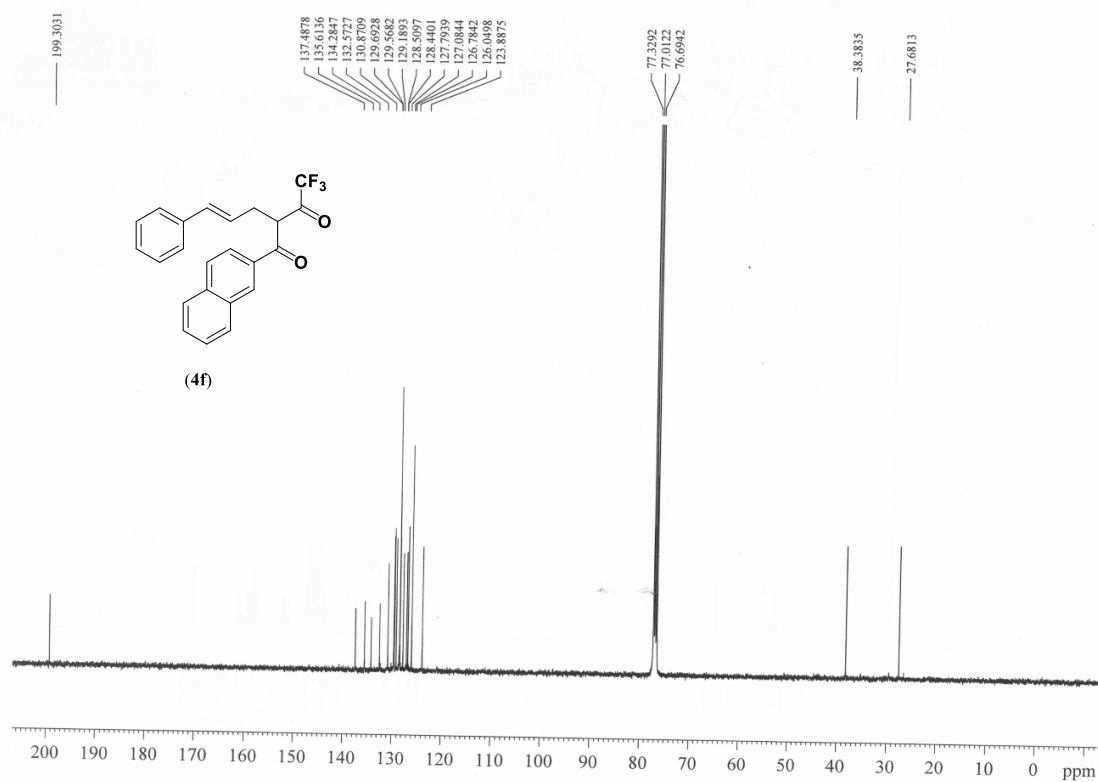

**Figure S22**  $^{13}\text{C}$  NMR (100 MHz) spectrum of compound **4f** in  $\text{CDCl}_3$

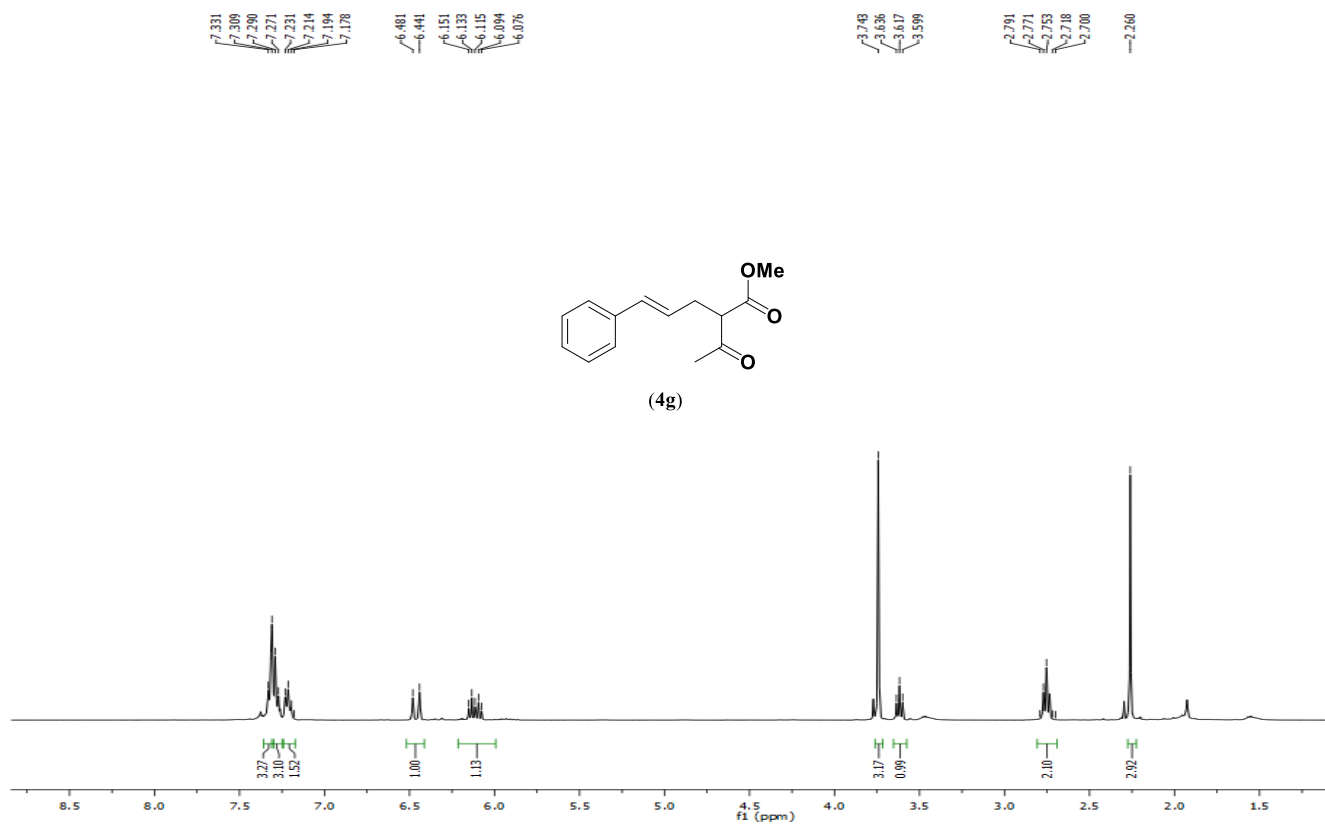

**Figure S23** <sup>1</sup>H NMR (400 MHz) spectrum of compound **4g** in CDCl<sub>3</sub>

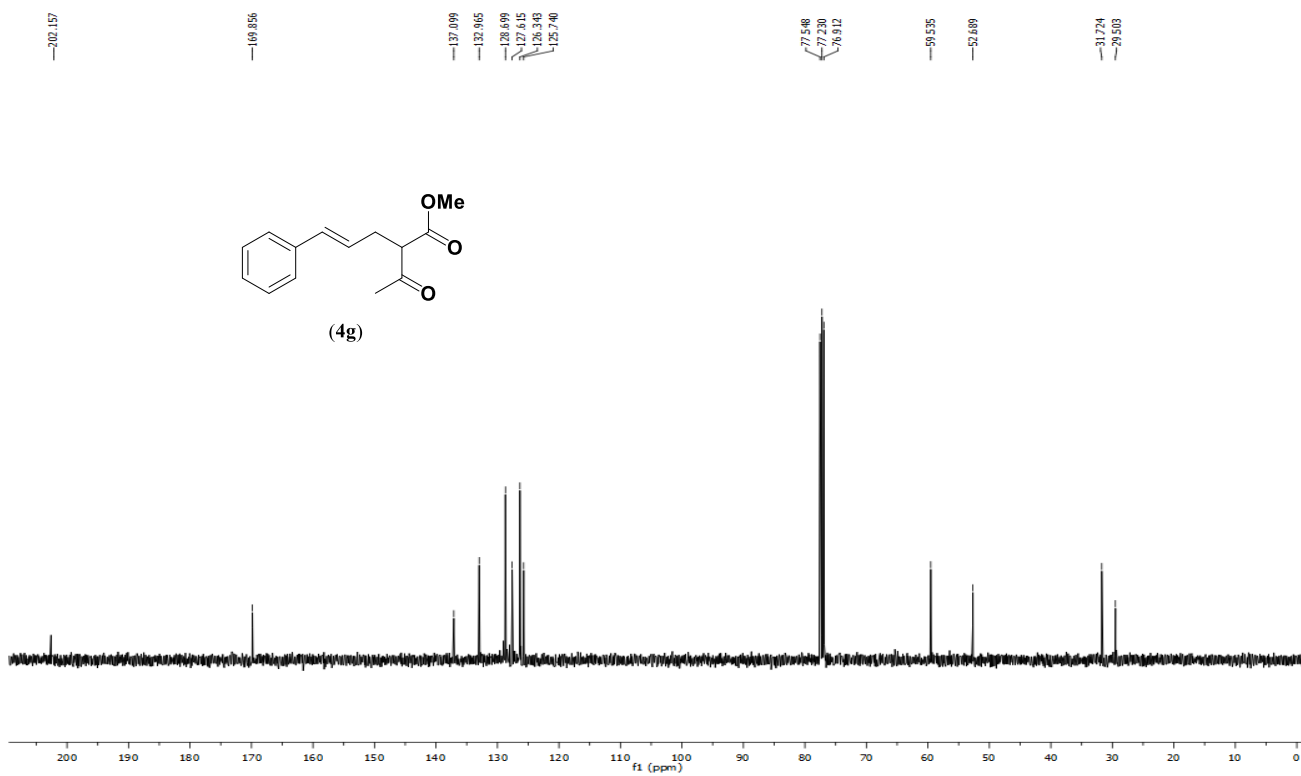

**Figure S24** <sup>13</sup>C NMR (100 MHz) spectrum of compound **4g** in CDCl<sub>3</sub>

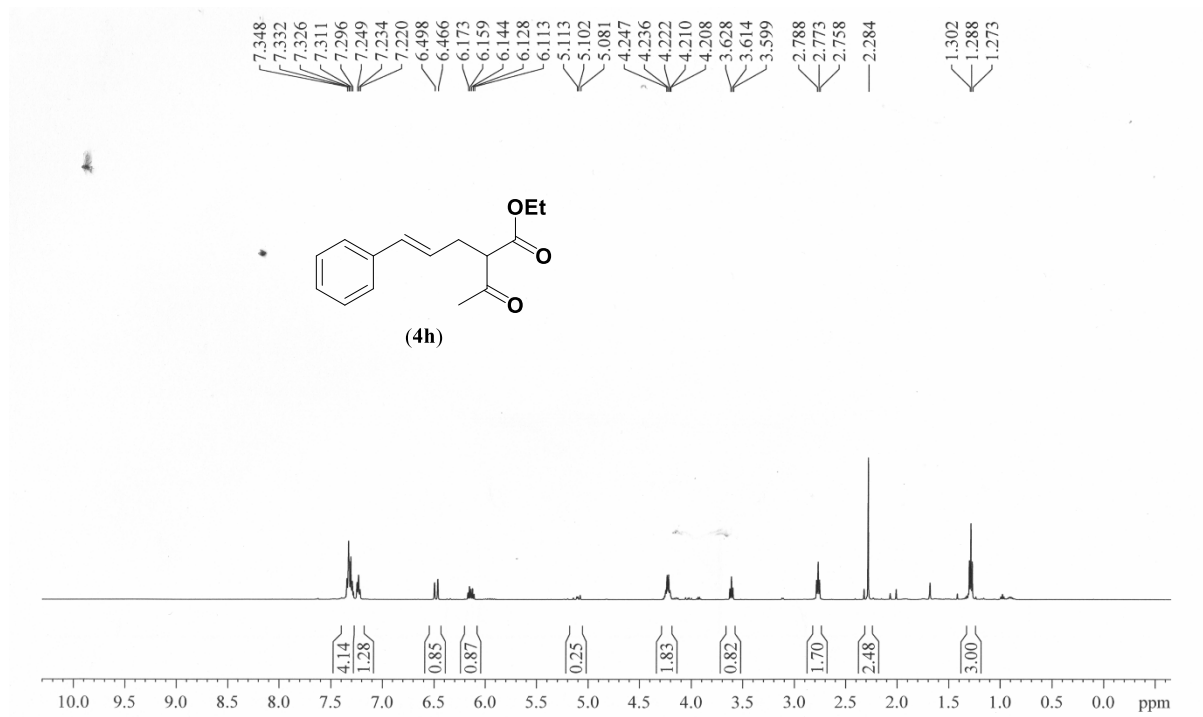

**Figure S25**  $^1\text{H}$  NMR (500 MHz) spectrum of compound **4h** in  $\text{CDCl}_3$

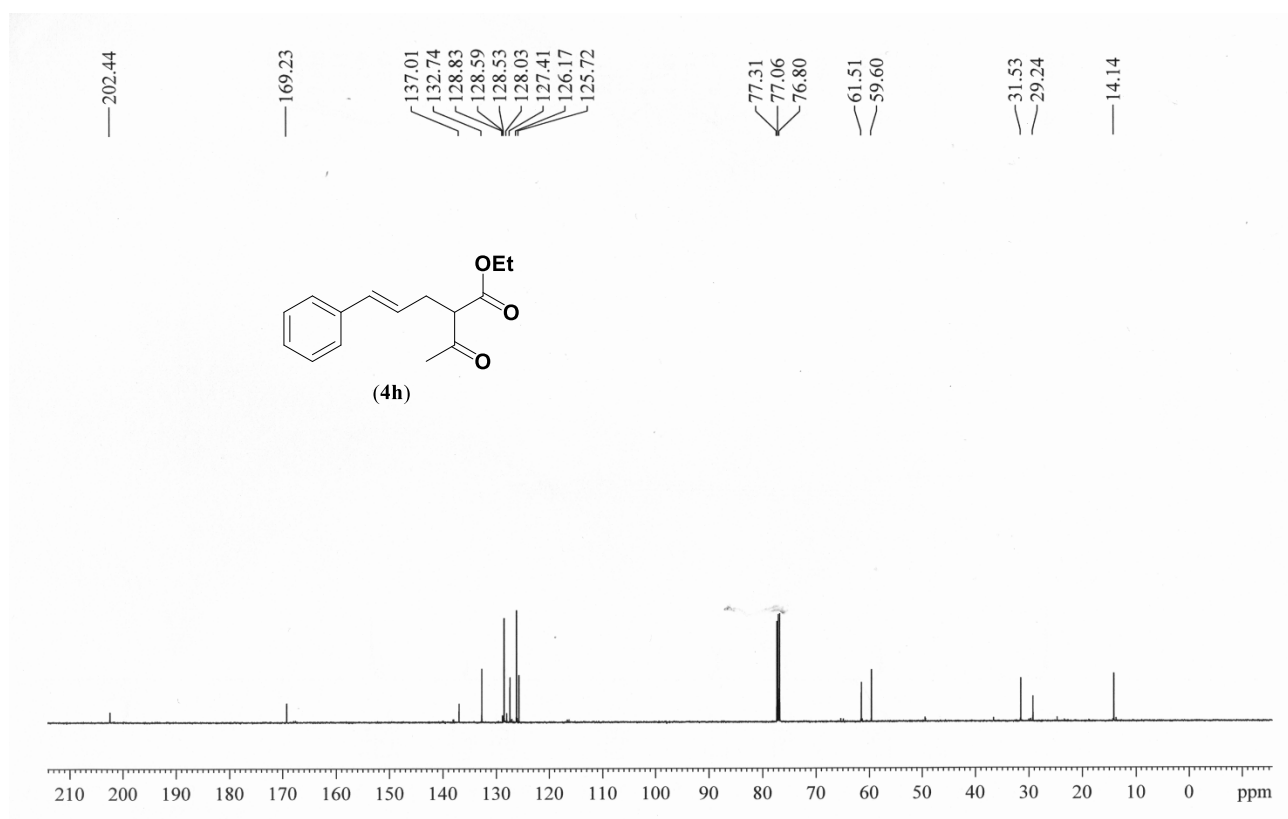

**Figure S26**  $^{13}\text{C}$  NMR (125 MHz) spectrum of compound **4h** in  $\text{CDCl}_3$

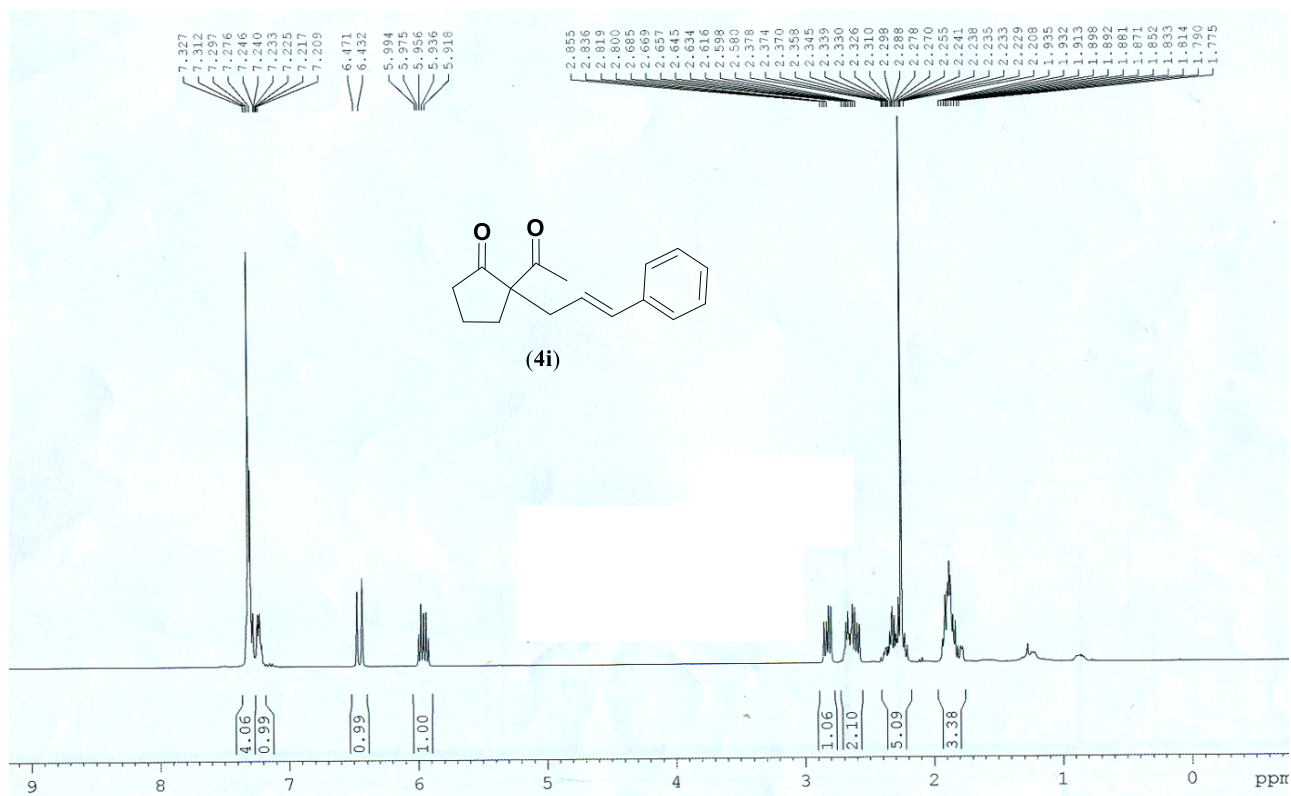

Figure S27 <sup>1</sup>H NMR (400 MHz) spectrum of compound **4i** in CDCl<sub>3</sub>

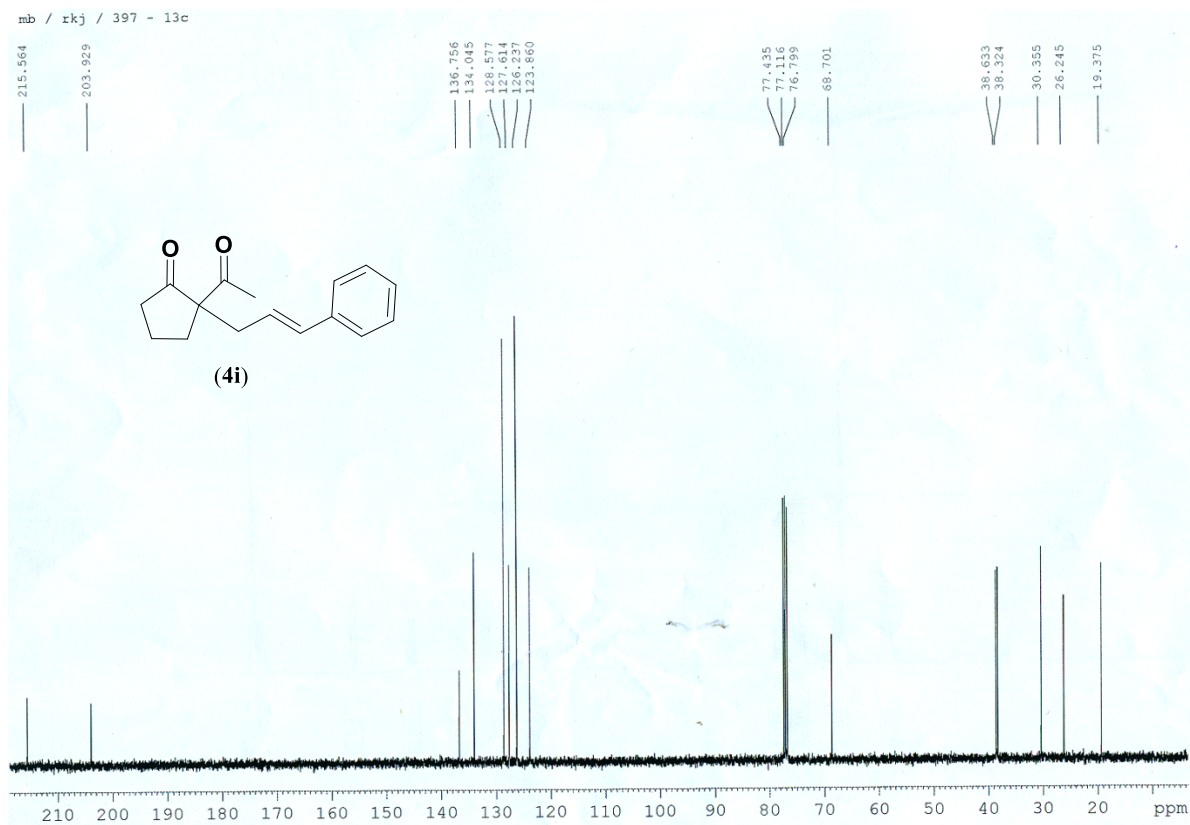

Figure S28 <sup>13</sup>C NMR (100 MHz) spectrum of compound **4i** in CDCl<sub>3</sub>

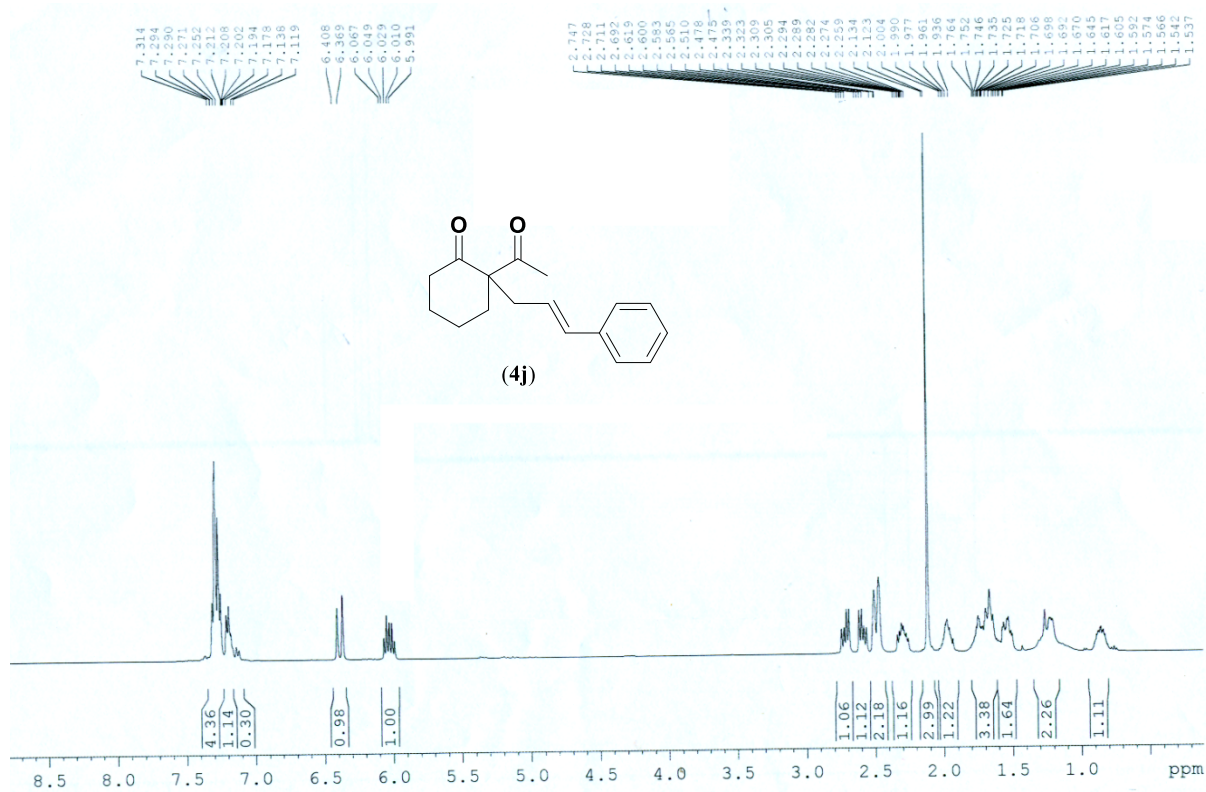

**Figure S29** <sup>1</sup>H NMR (400 MHz) spectrum of compound **4j** in CDCl<sub>3</sub>

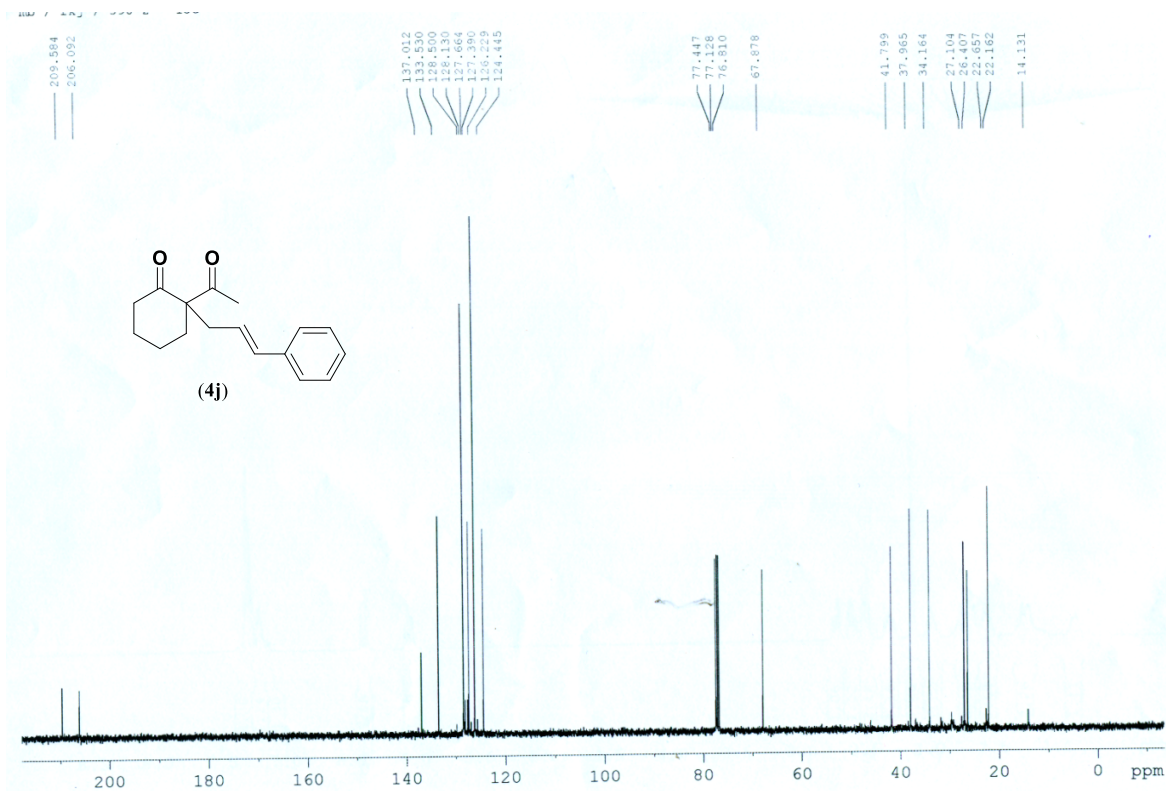

**Figure S30** <sup>13</sup>C NMR (100 MHz) spectrum of compound **4j** in CDCl<sub>3</sub>



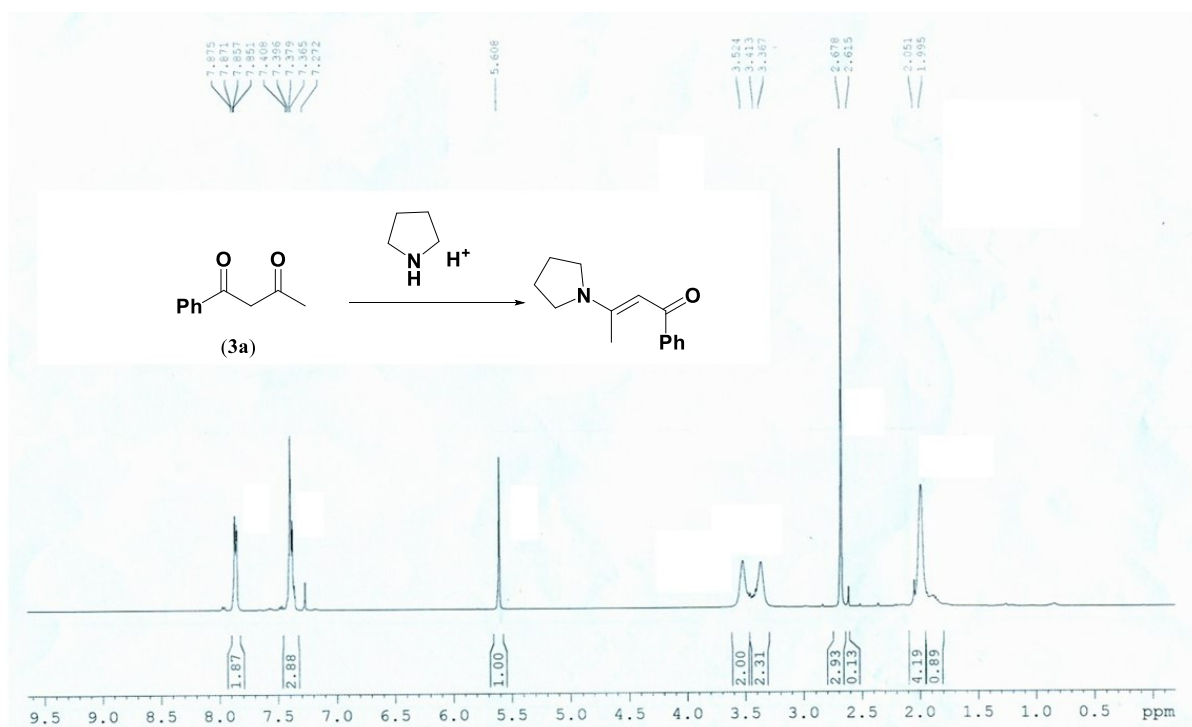

**Figure S31** <sup>1</sup>H NMR (400 MHz) spectrum of 1-Phenyl-1,3-butenedione (**3a**) with pyrrolidine and acetic acid in CDCl<sub>3</sub>

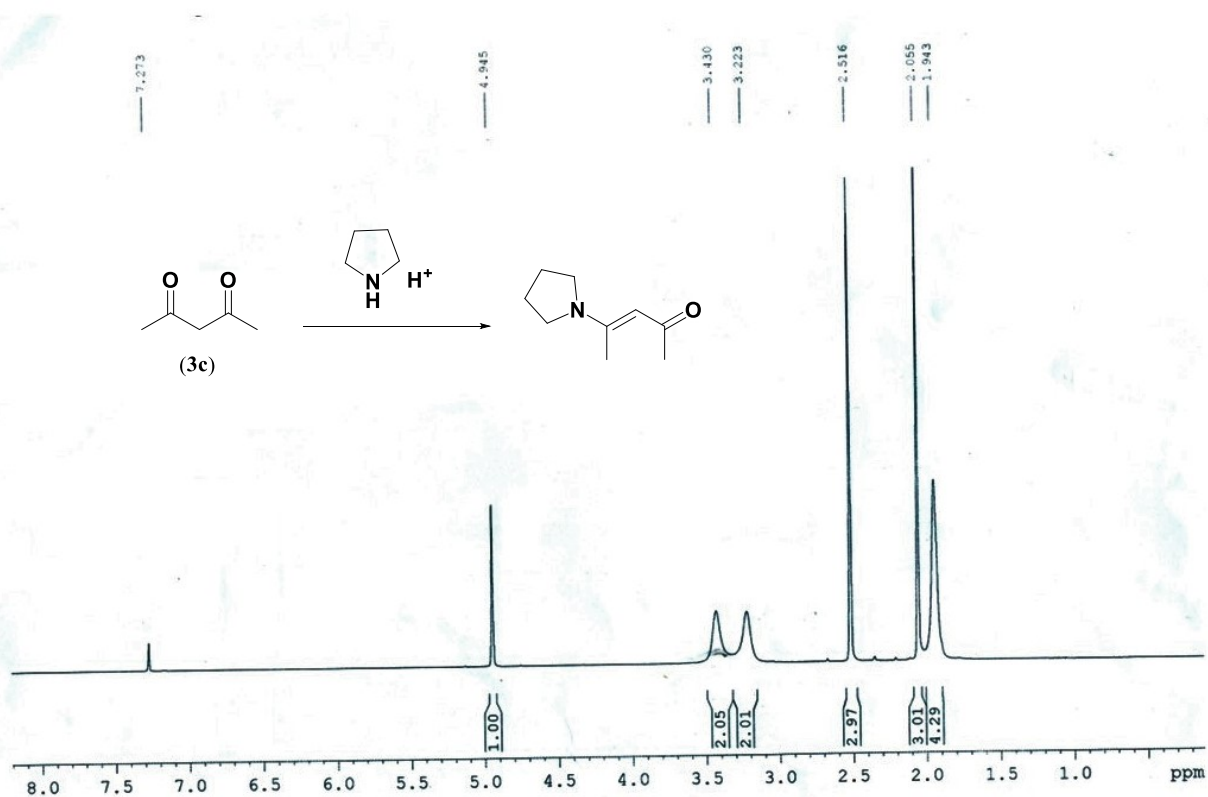

**Figure S32** <sup>1</sup>H NMR (400 MHz) spectrum of Acetylacetone (**3c**) with pyrrolidine and acetic acid in CDCl<sub>3</sub>

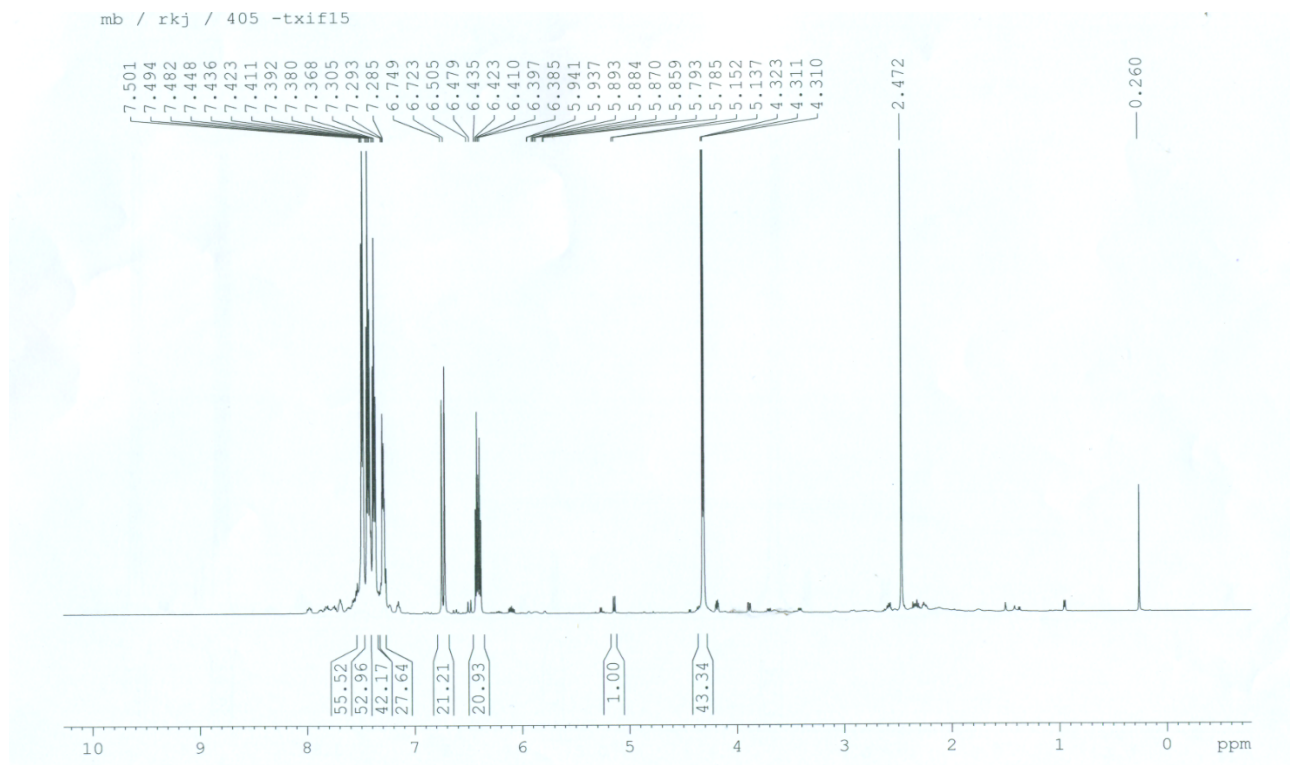

**Figure S33**  $^1\text{H}$  NMR (400 MHz) spectrum of **1** + Cinnamyl alcohol (**2**) in Toluene- $\text{D}_8$

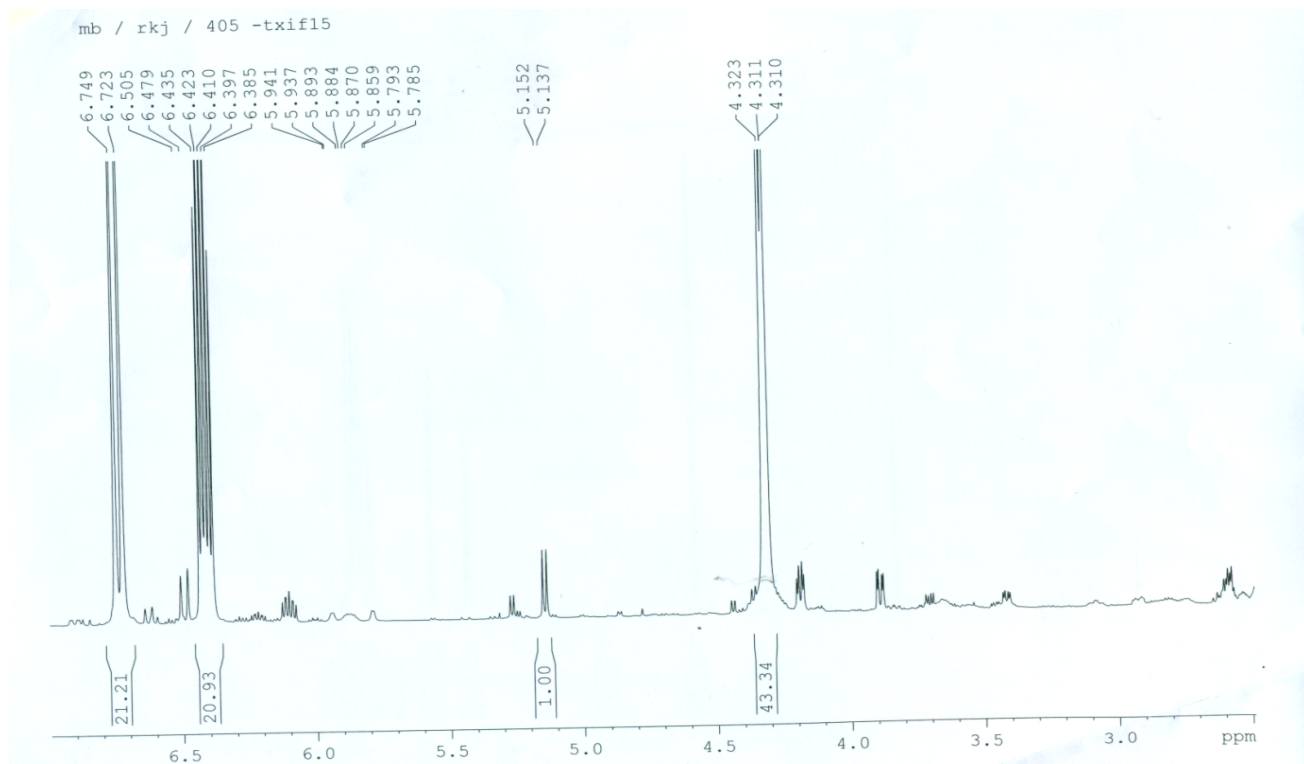

**Figure S34**  $^1\text{H}$  NMR (400 MHz) spectrum of **1** + Cinnamyl alcohol (**2**) in Toluene- $\text{D}_8$  (expanded)



```

=====
Acq. Operator   : BIBEK
Acq. Instrument : HPLC
Injection Date  : 08-12-2016 23:23:17
Location       : Vial 1
Inj Volume     : Manually

Acq. Method    : C:\CHEM32\1\METHODS\METH1.M
Last changed   : 08-12-2016 23:21:40 by BIBEK
                (modified after loading)
Analysis Method : C:\CHEM32\1\DATA\SUSIT\08122016000007.D\DA.M (METH1.M, From Data File)
Last changed   : 25-01-2017 09:56:04 by BIBEK
                (modified after loading)

```

CHIRALPAK IA-3 250MM , 10 % iPrOH/HEXANE 1.0 ml/min flow rate, 254 nm

Additional Info : Peak(s) manually integrated

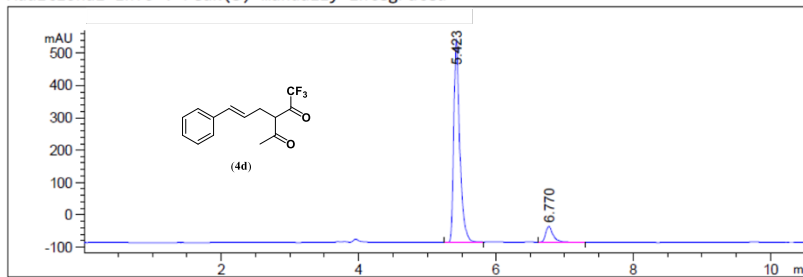

Area Percent Report

```

Sorted By      : Signal
Multiplier    : 1.0000
Dilution      : 1.0000
Use Multiplier & Dilution Factor with ISTDs

```

Signal 1: DAD1 A, Sig=254,4 Ref=360,100

| Peak # | RetTime [min] | Type | Width [min] | Area [mAU*s] | Height [mAU] | Area %  |
|--------|---------------|------|-------------|--------------|--------------|---------|
| 1      | 5.423         | BV   | 0.0891      | 3806.06372   | 624.55359    | 90.9869 |
| 2      | 6.770         | VB   | 0.1145      | 377.02780    | 49.70564     | 9.0131  |

Totals : 4183.09152 674.25923

Figure S35 Chiral HPLC of 4d

Acq. Operator : bibek  
 Acq. Instrument : HPLC Location : Vial 1  
 Injection Date : 29-01-2018 19:53:38 Inj Volume : Manually  
 Acq. Method : C:\CHEM32\1\METHODS\METH1.M  
 Last changed : 29-01-2018 19:52:43 by bibek  
 (modified after loading)  
 Analysis Method : C:\CHEM32\1\METHODS\METH1.M  
 Last changed : 31-01-2018 12:58:36 by bibek  
 (modified after loading)

CHIRALPAK IA-3, 250 MM, IPA/HEXANE : 10:90, 1.0 ml/min flow rate, 254

Additional Info : Peak(s) manually integrated

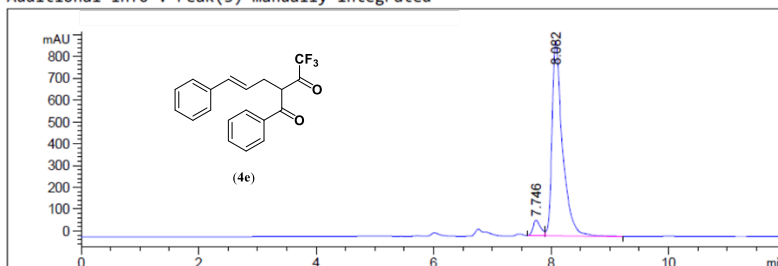

=====  
 Area Percent Report  
 =====

Sorted By : Signal  
 Multiplier : 1.0000  
 Dilution : 1.0000  
 Use Multiplier & Dilution Factor with ISTDs

Signal 1: DAD1 A, Sig=254,4 Ref=360,100

| Peak # | RetTime [min] | Type | Width [min] | Area [mAU*s] | Height [mAU] | Area %  |
|--------|---------------|------|-------------|--------------|--------------|---------|
| 1      | 7.746         | BV   | 0.1363      | 651.34174    | 71.45866     | 5.6403  |
| 2      | 8.082         | VB   | 0.1764      | 1.08967e4    | 892.80103    | 94.3597 |

Totals : 1.15480e4 964.25969

Figure S36 Chiral HPLC of 4e

Acq. Operator : bibek  
 Acq. Instrument : HPLC Location : Vial 1  
 Injection Date : 29-01-2018 19:36:58 Inj Volume : Manually  
 Acq. Method : C:\CHEM32\1\METHODS\METH1.M  
 Last changed : 29-01-2018 19:36:02 by bibek  
 (modified after loading)  
 Analysis Method : C:\CHEM32\1\METHODS\METH1.M  
 Last changed : 31-01-2018 12:59:40 by bibek  
 (modified after loading)

CHIRALPAK IA-3, 250 MM, IPA/HEXANE : 10:90, 1.0 ml/min flow rate, 254

Additional Info : Peak(s) manually integrated

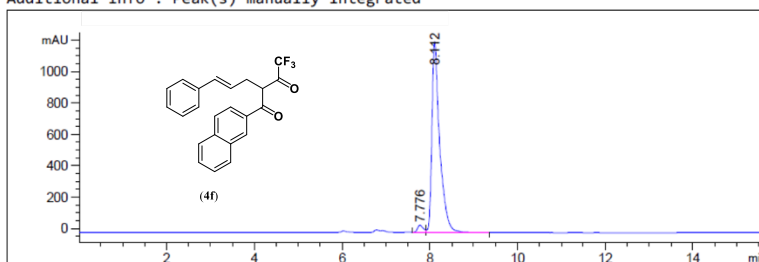

=====  
 Area Percent Report  
 =====

Sorted By : Signal  
 Multiplier : 1.0000  
 Dilution : 1.0000  
 Use Multiplier & Dilution Factor with ISTDs

Signal 1: DAD1 A, Sig=254,4 Ref=360,100

| Peak # | RetTime [min] | Type | Width [min] | Area [mAU*s] | Height [mAU] | Area %  |
|--------|---------------|------|-------------|--------------|--------------|---------|
| 1      | 7.776         | BV   | 0.1377      | 427.44101    | 46.29233     | 2.7700  |
| 2      | 8.112         | VB   | 0.1781      | 1.50035e4    | 1214.52356   | 97.2300 |

Totals : 1.54310e4 1260.81589

Figure S37 Chiral HPLC of 4f

```

=====
Acq. Operator   : BIBEK
Acq. Instrument : HPLC
Injection Date  : 08-12-2016 22:47:12
Location       : Vial 1
Inj Volume     : Manually

Acq. Method    : C:\CHEM32\1\METHODS\METH1.M
Last changed   : 08-12-2016 22:46:37 by BIBEK
                (modified after loading)
Analysis Method: C:\CHEM32\1\DATA\SUSIT\08122016000004.D\DA.M (METH1.M, From Data File)
Last changed   : 26-01-2017 11:52:49 by BIBEK
                (modified after loading)

```

CHIRALPAK IA-3 250MM , 10 % iPrOH/HEXANE 1.0 ml/min flow rate, 254 nm

Additional Info : Peak(s) manually integrated

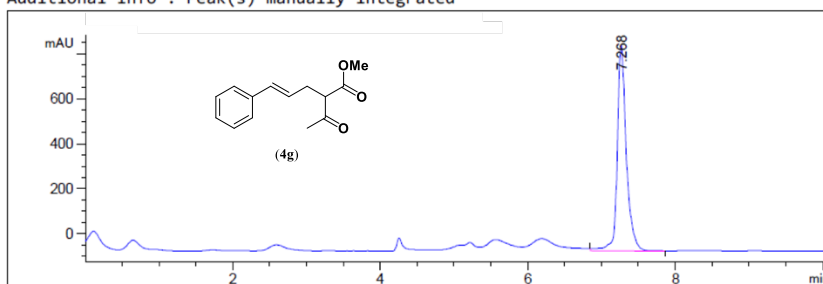

Area Percent Report

```

Sorted By      : Signal
Multiplier     : 1.0000
Dilution       : 1.0000
Use Multiplier & Dilution Factor with ISTDs

```

Signal 1: DAD1 A, Sig=254,4 Ref=360,100

| Peak # | RetTime [min] | Type | Width [min] | Area [mAU*s] | Height [mAU] | Area %   |
|--------|---------------|------|-------------|--------------|--------------|----------|
| 1      | 7.268         | VB   | 0.1274      | 7779.70801   | 913.29669    | 100.0000 |

Totals : 7779.70801 913.29669

Figure S38 Chiral HPLC of 4g

```

=====
Acq. Operator   : BIBEK
Location       : Vial 1
Injection Date  : 08-12-2016 22:58:02
Acq. Method    : METH1.M
Analysis Method: C:\CHEM32\1\DATA\SUSIT\08122016000005.D\DA.M (METH1.M, From Data File)
Last changed   : 26-01-2017 11:50:54 by BIBEK
                (modified after loading)

```

CHIRALPAK IA-3 250MM , 10 % iPrOH/HEXANE 1.0 ml/min flow rate, 254 nm

Additional Info : Peak(s) manually integrated

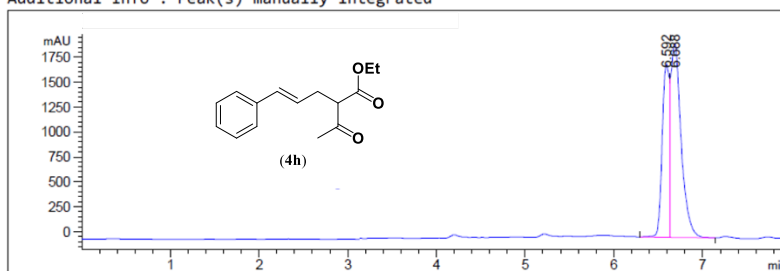

Area Percent Report

```

Sorted By      : Signal
Multiplier     : 1.0000
Dilution       : 1.0000
Use Multiplier & Dilution Factor with ISTDs

```

Signal 1: DAD1 A, Sig=254,4 Ref=360,100

| Peak # | RetTime [min] | Type | Width [min] | Area [mAU*s] | Height [mAU] | Area %  |
|--------|---------------|------|-------------|--------------|--------------|---------|
| 1      | 6.592         | BV   | 0.0839      | 9504.08594   | 1736.27625   | 37.3413 |
| 2      | 6.688         | VB   | 0.1198      | 1.59478e4    | 1942.84363   | 62.6587 |

Totals : 2.54519e4 3679.11987

Figure S39 Chiral HPLC of 4h

Acq. Operator : BIBEK  
 Acq. Instrument : HPLC Location : Vial 1  
 Injection Date : 08-12-2016 23:35:15 Inj Volume : Manually  
 Acq. Method : C:\CHEM32\1\METHODS\METH1.M  
 Last changed : 08-12-2016 23:33:59 by BIBEK  
 (modified after loading)  
 Analysis Method : C:\CHEM32\1\DATA\SUSIT\08122016000008.D\DA.M (METH1.M, From Data File)  
 Last changed : 25-01-2017 09:54:57 by BIBEK  
 (modified after loading)

CHIRALPAK IA-3 250MM , 10 % iPrOH/HEXANE 1.0 ml/min flow rate, 254 nm

Additional Info : Peak(s) manually integrated

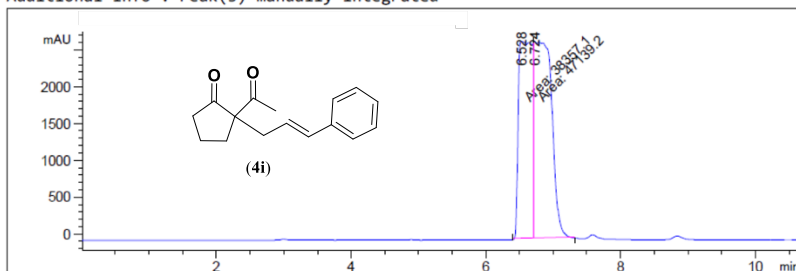

=====  
 Area Percent Report  
 =====

Sorted By : Signal  
 Multiplier : 1.0000  
 Dilution : 1.0000  
 Use Multiplier & Dilution Factor with ISTDs

Signal 1: DAD1 A, Sig=254,4 Ref=360,100

| Peak # | RetTime [min] | Type | Width [min] | Area [mAU*s] | Height [mAU] | Area %  |
|--------|---------------|------|-------------|--------------|--------------|---------|
| 1      | 6.528         | MF   | 0.2393      | 3.83571e4    | 2671.10107   | 44.8641 |
| 2      | 6.724         | FM   | 0.2951      | 4.71392e4    | 2662.14160   | 55.1359 |

Totals : 8.54964e4 5333.24268

Figure S40 Chiral HPLC of 4i

```

-----
Acq. Operator   : bibek
Acq. Instrument : HPLC
Injection Date  : 29-01-2018 20:32:32
Location        : Vial 1
Inj Volume     : Manually

Acq. Method    : C:\CHEM32\1\METHODS\METH1.M
Last changed   : 29-01-2018 20:31:48 by bibek
                (modified after loading)
Analysis Method : C:\CHEM32\1\METHODS\METH1.M
Last changed   : 31-01-2018 13:01:46 by bibek
                (modified after loading)

```

CHIRALPAK IA-3, 250 MM, IPA/HEXANE : 10:90, 1.0 ml/min floc

Additional Info : Peak(s) manually integrated

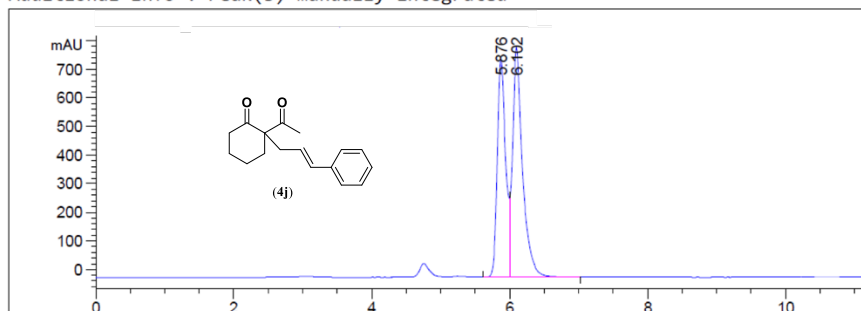

=====  
Area Percent Report  
=====

```

Sorted By      : Signal
Multiplier     : 1.0000
Dilution       : 1.0000
Use Multiplier & Dilution Factor with ISTDs

```

Signal 1: DAD1 A, Sig=254,4 Ref=360,100

| Peak # | RetTime [min] | Type | Width [min] | Area [mAU*s] | Height [mAU] | Area %  |
|--------|---------------|------|-------------|--------------|--------------|---------|
| 1      | 5.876         | BV   | 0.1240      | 6263.58252   | 761.51666    | 43.3013 |
| 2      | 6.102         | VB   | 0.1454      | 8201.54199   | 801.19952    | 56.6987 |

Totals : 1.44651e4 1562.71619

Figure S41 Chiral HPLC of 4j
